# Supplementary material for: Co-templating of polyoxoniobates and silicate/germanate trimer-rings in crystals and inorganic gels
Source: Royal Society of Chemistry journal article supplement (doi:10.1039/d6sc02933g), 2026-05-19
Supplement: d6sc02933g1.pdf [file d6sc02933g1.pdf]

## Supplementary Information

### Co-templating of polyoxoniobates and silicate/germanate trimer-rings in crystals and inorganic gels

Makenzie T. Nord,<sup>a,b</sup> Andrew P. Porter,<sup>c,d</sup> Detcho J. N. Aboa,<sup>†e</sup> Robert S. Minning,<sup>†e</sup> Karlie Bach,<sup>a</sup> Emily Hiatt,<sup>a</sup> Wesley T. Surta,<sup>f</sup> Lev N. Zakharov,<sup>a</sup> Aaron J. Rossini,<sup>c,d</sup> May Nyman<sup>\*a</sup>

*\*Corresponding author*

*† These authors contributed equally.*

- a. Department of Chemistry, Oregon State University, Corvallis, OR, 97331, USA. E-mail: [may.nyman@oregonstate.edu](mailto:may.nyman@oregonstate.edu)*
- b. Current address: Nuclear and Radiochemistry (C-NR), Los Alamos National Laboratory, Mail Stop J-514, Los Alamos, NM, 87545, USA.*
- c. Ames National Laboratory, Ames, Division of Materials Science and Engineering, Iowa, 50011, USA*
- d. Department of Chemistry, Iowa State University, Ames, IA, 50011, USA.*
- e. Phosio Corporation, Corvallis, OR, 97330, USA.*
- f. Department of Mechanical, Industrial, and Manufacturing Engineering, Oregon State University, Corvallis, OR, 97331, USA.*

## Table of Contents

|                                                                              |    |
|------------------------------------------------------------------------------|----|
| 1. Instrumentation .....                                                     | 3  |
| 2. Synthesis .....                                                           | 6  |
| 3. Precipitation of Na-Nb <sub>6</sub> before CO <sub>2</sub> infusion. .... | 9  |
| 4. Crystallographic information.....                                         | 10 |
| 5. <sup>133</sup> Cs NMR Spectroscopy. ....                                  | 25 |
| 6. Small-angle X-ray Scattering of Redissolved Crystals. ....                | 29 |
| 7. <sup>29</sup> Si NMR Spectroscopy. ....                                   | 31 |
| 8. Characterization of precipitates, SEM/EDS .....                           | 35 |
| 9. SAXS time-study.....                                                      | 40 |
| 10. Raman and FTIR Spectroscopy; Gel characterization .....                  | 41 |
| 11. <sup>31</sup> P NMR Spectroscopy.....                                    | 45 |
| 12. Thermogravimetry-mass spectroscopy and CHN analysis.....                 | 52 |
| 13. Optical Spectroscopy.....                                                | 55 |
| 14. Electronic Properties.....                                               | 56 |

# 1. Instrumentation

*X-ray Crystallography.* Diffraction intensities for **Nb<sub>16</sub>Si<sub>3</sub>-CO<sub>3</sub>** and **Nb<sub>16</sub>Ge<sub>3</sub>-CO<sub>3</sub>** were collected at 223 K (**Nb<sub>16</sub>Si<sub>3</sub>-CO<sub>3</sub>**) and 173 K (**Nb<sub>16</sub>Ge<sub>3</sub>-CO<sub>3</sub>**) on a Rigaku SynergyS single crystal diffractometer using CuK $\alpha$  radiation (1.54184 Å) equipped with a PhotonJet-S Cu source ( $\lambda = 1.54178$  Å) and a HyPix-6000HE photon counting detector. Space groups were determined based on systematic absences (**Nb<sub>16</sub>Si<sub>3</sub>-CO<sub>3</sub>**) and intensity statistics (**Nb<sub>16</sub>Ge<sub>3</sub>-CO<sub>3</sub>**). Absorption corrections were applied by SADABS.<sup>1</sup> Structures were solved by direct methods and Fourier techniques and refined on  $F^2$  using full matrix least-squares procedures. All non-H atoms were refined with anisotropic thermal parameters. H atoms in both structures were not found and not taken into consideration. X-ray diffraction from these crystals is very weak at high angles. The diffraction data for both samples were collected only up to  $2\theta_{\max} = 102.028^\circ$  (**Nb<sub>16</sub>Si<sub>3</sub>-CO<sub>3</sub>**) and  $101.864^\circ$  (**Nb<sub>16</sub>Ge<sub>3</sub>-CO<sub>3</sub>**). However, it provides the appropriate number of measured reflections per the number of the refined parameters: 16398/1740 (**Nb<sub>16</sub>Si<sub>3</sub>-CO<sub>3</sub>**) and 17293/1860 (**Nb<sub>16</sub>Ge<sub>3</sub>-CO<sub>3</sub>**). A relatively high value of  $R_{\text{int}}$  in **Nb<sub>16</sub>Si<sub>3</sub>-CO<sub>3</sub>** is also related to very weak reflections at high angles. It was found that the crystal **Nb<sub>16</sub>Si<sub>3</sub>-CO<sub>3</sub>** used for data collection was a twin consisting of two domains in a ratio of 82/18. The structure was determined and refined from HKLF4 reflections corresponding exclusively to the largest domain. The refinement of the structure based on the full reflection data, HKL5, did not yield an improved structure or goodness of fit, due to the combination of twinning and complex counterion and solvent-molecule disorder. In the structure, there are many disordered Cs and Na counterions, along with solvent water molecules, forming a complex network surrounding the Nb-POM. Some of the Cs atoms are disordered over two, three, and even four positions. Some positions of the Cs, Na, and O atoms are partially occupied. The Na atoms were assigned based on the refinement for the occupation factors and the difference between the Na-O and Cs-O contacts. In the residual density, several relatively high peaks are observed, mainly near the Cs atoms, indicating complex disorder of counterions and solvent water molecules. The RIGU option was used to refine both structures. All calculations were performed by the Bruker SHELXL-2014/7 package.<sup>2</sup>

*Small-angle X-ray Scattering (SAXS).* SAXS data were collected using an Anton-Parr SAXSess instrument with Cu-K $\alpha$  radiation and line collimation. A 2-D image plate was used to collect data over the  $q$  range  $0.018\text{--}2.5 \text{ \AA}^{-1}$ , with a sample-to-image plate distance of 26.1 cm. For **Nb<sub>16</sub>Si<sub>3</sub>-CO<sub>3</sub>** and **Nb<sub>16</sub>Ge<sub>3</sub>-CO<sub>3</sub>**, a 1, 2, 5, or 10 mM solution was prepared by dissolving the crystals in DI water, which was then syringe filtered (0.45  $\mu\text{m}$ ), loaded into a 1.5 mm glass capillary, and sealed with wax. For the time studies, the reaction solutions were prepared at normal concentration (1 M Cs-Nb<sub>6</sub>) and diluted to 10 mM before analysis. Na<sub>4</sub>SiO<sub>4</sub> was used as prepared for the CO<sub>2</sub> desiccator ( $\sim 0.7$  M Si). DI water was used as the solvent background, and scattering was measured for 30 minutes.

SAXSQUNT software was used for data collection and processing (normalization, primary beam removal, and background subtraction). The IRENA30 macros<sup>3</sup> within IGOR Pro 8.0.4.02 (WaveMetrics) software were used to plot and analyze the data. Simulated scattering curves were generated using SolX, utilizing structural files (.xyz) containing the entire structure or portions of it.

*Thermogravimetric analysis–mass spectroscopy (TGA-MS).* TGA analysis was done using a TA Instruments SDT Q600 and a Hien Gas Analyzer HPR-20 QIC EGA mass spectrometer. 20-50 mg of dried crystalline material or wet or dry gels was loaded into an alumina crucible and heated from room temperature to 900 °C at a rate of 10 °C/min under argon (100 mL/min). The chamber was flushed with argon gas for 2 hours prior to analysis to minimize background noise.

*CHN Analysis.* The carbon content was characterized using an NC2500 ThermoQuest Elemental Analyzer and an ECS 4010 CHNSO Analyzer, both fitted with a Costech Zero Blank Autosampler. For each sample, 3-6 mg was loaded into tin capsules and run in duplicate, with duplicate masses differing by no more than ±0.5 mg. The reported results are the average of the duplicate measurements of carbon content.

*Raman Spectroscopy.* Raman spectra were collected using a Thermo Scientific DXR spectrometer with a 780 nm laser source, a 400 lines per millimeter grating, a 50 µm slit, and 16 scans per spectrum.

*Fourier-Transform Infrared Spectroscopy (FTIR).* FTIR was collected on a PerkinElmer Spectrum Two FTIR Spectrometer from 400 to 4000 cm<sup>-1</sup> using 16 scans per spectrum.

*Solution-state Nuclear Magnetic Resonance Spectroscopy (NMR).* Solution-state NMR was collected on a 500 MHz Bruker Ascend spectrometer equipped with a BBO probe. All samples were prepared using a solvent volume ratio of 90-10 H<sub>2</sub>O-D<sub>2</sub>O. Under normal crystallization conditions, the final concentration of Cs<sub>4</sub>SiO<sub>4</sub> in the reaction solution is ~ 0.7 M. To mimic these conditions, the concentration was maintained at 0.7 M, but the reaction was scaled up to 600 µL (from 250 µL) to ensure an adequate volume for analysis. For <sup>29</sup>Si, the experiments were carried out at 25 °C using Bruker's zgig pulse program, modified to 1128 scans with a recycle delay of 30 seconds to allow all silicon resonances to relax fully. Data processing was performed with custom Python scripts using nmrPipe to apodize, zero-fill, Fourier-transform, and apply 5 Hz of line broadening to each data set. Baseline correction was performed using pybaseline with an improved asymmetrically reweighted penalized least squares Whittaker smoothing function. The <sup>133</sup>Cs experiments were collected over 128 scans and performed at 5, 10, 25, 35, 45, and 55 °C. The probe was cooled, and the sample temperature was allowed to equilibrate for 5 minutes before

analysis began. An external standard (0.1 M CsNO<sub>3</sub>) was measured before each sample, and the axis was calibrated to 0 ppm.

*Solid-state NMR Spectroscopy.* Most solid-state NMR (ssNMR) spectroscopy experiments were performed with a Bruker widebore NMR spectrometer with  $B_0 = 9.4$  T, equipped with an AVANCE III HD console. <sup>133</sup>Cs and <sup>29</sup>Si NMR experiments at 9.4 T utilized a 4 mm HXY Bruker MAS probe configured in double resonance HX mode.  $\pi/2$  and  $\pi$  pulses were scaled from <sup>13</sup>C hard pulse calibration. <sup>133</sup>Cs  $\pi/2$  and  $\pi$  pulse durations were 25  $\mu$ s and 50  $\mu$ s, respectively, corresponding to an RF field of 10 kHz. <sup>29</sup>Si  $\pi/2$  and  $\pi$  pulse lengths were calibrated to be 6.0 and 12.0  $\mu$ s, corresponding to an RF field of ca. 42 kHz. Additional <sup>133</sup>Cs ssNMR experiments at 14.1 T utilized a 600 MHz Bruker wide-bore magnet with a Bruker AVANCE NEO console. <sup>133</sup>Cs and <sup>31</sup>P NMR experiments used a 4 mm Bruker HXY probe in double mode. For <sup>31</sup>P, an RF field of ~51 kHz, corresponding to 4.9 and 9.8  $\mu$ s pulse length, was used as the  $\pi/2$  and  $\pi$  pulse. For the <sup>1</sup>H $\rightarrow$ <sup>31</sup>P CP, <sup>1</sup>H and <sup>31</sup>P spin lock pulses during the CP step had optimized RF fields of 99 kHz and 80 kHz, respectively, with contact times of 5 ms and 14 ms. All NMR experiments were indirectly referenced to <sup>1</sup>H frequency of TMS ( $\delta_{\text{iso}}(^1\text{H}) = 1.82$  ppm) using the IUPAC relative NMR frequency.<sup>4</sup>

*Spectroscopic Ellipsometry (SE).* The gel thin films were prepared on an n-type silicon (100) substrate. The silicon wafer was cleaned in sequential acetone, isopropanol, and DI water baths, followed by oxidation of the substrate surface to SiO<sub>2</sub> by O<sub>2</sub> plasma ashing for 15 min at 50 W and 150 mTorr. On the substrate, 50  $\mu$ L (Nb-Si, Nb-Ge) or 25  $\mu$ L (Nb-PO<sub>4</sub>) of syringe-filtered (0.45  $\mu$ m) precursor solution was spin-coated at 6000 rpm for 3 minutes. A JA Woolam spectroscopic ellipsometer was used to characterize the thickness and refractive index of the films. Ellipsometer measurements were taken over two angles (55° and 60°), while recording the change in psi and delta over the 350-1000 nm wavelength range. The data was fitted using CompleteEASE software against a Cauchy model (**equation 1**) using a Levenberg-Marquardt algorithm to perform a least squares fit. When the software could not automatically fit the data, the model's variable parameters (thickness, A, B, and C) were manually varied until a convergent model with a satisfactorily low MSE was produced.

$$n(\lambda) = A + \frac{B}{\lambda^2} + \frac{C}{\lambda^4} \quad (1)$$

*UV-visible spectroscopy (UV-vis).* The thin films were prepared on glass slides (2" X 2"), and spin coating was done using the same procedure described above for SE measurements. Thin-film UV-vis measurements were performed on an Avantes UV-vis spectrometer equipped with an AvaLight-DH-S Deuterium-Halogen light source and a 3648-pixel CCD camera and processed using the Avasoft 8 software. Data were collected from 800–260 nm with an integration time of 2.5 milliseconds.

*Impedance Spectroscopy.* Dielectric and impedance data were measured on cylindrical monoliths of the Si and Ge gels prepared by slow evaporation. Phosphate gels were investigated, but their poor mechanical properties prevent them from being electroded. Monoliths were electroded using a silver epoxy (from MG Chemicals). The dielectric properties as a function of frequency were measured using an HP 4192 LF Impedance analyzer from 10 Hz to 1 MHz. The permittivity data were disregarded due to the high measured loss ( $\tan(\delta)$ ). The impedance data were measured using a Solartron SI 1260 Impedance Gain-Phase Analyzer with a 1296 Dielectric Interface, needed for insulating samples. Data was collected from 1 Hz to 1 MHz at a 100 mV AC bias and an integration time of 1 second. These data were fit using an equivalent circuit model containing parallel resistive and capacitive (constant phase) elements and a Warburg element in series. The fitting was performed using the ZView4 software package. The resistivity of the gel was calculated using:

$$\rho = R \left( \frac{A}{\ell} \right) \quad (2)$$

where  $\rho$  is the resistivity ( $\Omega \cdot \text{cm}$ ),  $R$  is the measured resistance ( $\Omega$ ),  $A$  is the area of the monolith ( $\text{cm}^2$ ), and  $\ell$  is the length of the monolith (cm).

From the resistivity, the conductivity was calculated using:

$$\sigma = \frac{1}{\rho} \quad (3)$$

where  $\rho$  is the resistivity ( $\Omega \cdot \text{cm}$ ).

## 2. Synthesis

*Synthesis of cesium hexaniobate,  $\text{Cs}_8[\text{Nb}_6\text{O}_{19}] \cdot 14\text{H}_2\text{O}$  (Cs-Nb<sub>6</sub>):*  $\text{CsNb}_6$  was synthesized following a previously reported procedure.<sup>5</sup> Briefly,  $\text{Nb}_2\text{O}_5 \cdot 3 \text{H}_2\text{O}$  (20.6115 g, ~129 mmol) is added in small aliquots to a 90 °C solution of 50 wt% CsOH in water (34 mL, 5.7 M). Each subsequent aliquot of  $\text{Nb}_2\text{O}_5$  is added once the solution becomes clear, indicating complete dissolution of the previous aliquot. Dissolution is slow initially but speeds up for later aliquots. The resulting solution is gravity-filtered, and the solid product is isolated by precipitation with excess isopropanol (IPA, 600 mL) under constant stirring. The resulting white powder is vacuum filtered, washed with additional IPA, and dried in a vacuum oven overnight. Product mass = 41.9784 g, formulated  $\text{Cs}_8\text{Nb}_6\text{O}_{19} \cdot 14 \text{H}_2\text{O}$ , yield = 89.8 % based on Nb.

*Synthesis of cesium silicate solution,  $\text{Cs}_4\text{SiO}_4$  (aq):* 5 mL of CsOH (50 wt%, 5.7 M, 28.5 mmol Cs) is placed in a vial in a preheated sand bath (90 °C). Under constant stirring, fumed silica ( $\text{SiO}_2$ , 0.43 g, 7.125 mmol) is added to the warm solution and stirred until completely

dissolved (~30 minutes). The equivalency ratio is four cesium to one silicon (~1.4 M Cs<sub>4</sub>SiO<sub>4</sub>).

*Synthesis of sodium germanate solution, Na<sub>4</sub>GeO<sub>4</sub> (aq):* 2 mL of NaOH (4 M, 8 mmol Na) is placed in a vial in a preheated sand bath (90°C). Under constant stirring, germanium oxide (GeO<sub>2</sub>, 0.209 g, 2 mmol) is added to the warm solution and stirred until completely dissolved (~45 minutes). The equivalency ratio is four sodium to one germanium (~1 M Na<sub>4</sub>GeO<sub>4</sub>).

*Synthesis of cesium phosphate, tribasic, Cs<sub>3</sub>PO<sub>4</sub>:* 5 mL of CsOH (50 wt%, 5.7 M, 28.5 mmol Cs) is placed in a vial, followed by the slow, dropwise addition of concentrated H<sub>3</sub>PO<sub>4</sub> (14.6 M, 0.65 mL, 9.41 mmol PO<sub>4</sub><sup>3-</sup>) because the neutralization reaction is highly exothermic. The equivalency ratio is three cesium to one phosphate (~1.7 M Cs<sub>3</sub>PO<sub>4</sub>).

*Synthesis of Nb<sub>16</sub>Si<sub>3</sub>-CO<sub>3</sub>:* Crystalline Nb<sub>16</sub>Si<sub>3</sub>-CO<sub>3</sub> is synthesized by adding CsNb<sub>6</sub> (0.55 g, 1.5 mmol Nb, ~1 M Nb<sub>6</sub>) to 125 μL of DI H<sub>2</sub>O in a 4 mL vial, followed by the addition of 125 μL of 1.4 M Cs<sub>4</sub>SiO<sub>4</sub> (0.72 M SiO<sub>4</sub><sup>4-</sup>, 0.18 mmol Si). This gives a ratio of 8.3 Nb per 1 Si. The solution is stirred briefly, then placed uncapped in a desiccator prefilled with dry ice (2.4-2.8 lbs) and exposed to CO<sub>2</sub> for approximately 18 hours (overnight). Small, colorless, hexagonal Nb<sub>16</sub>Si<sub>3</sub>-CO<sub>3</sub> crystals begin appearing within 24 hours and are fully formulated as Cs<sub>24</sub>[Nb<sub>7</sub>O<sub>22</sub>(NbO(CO<sub>3</sub>)<sub>2</sub>)<sub>9</sub>(Si<sub>3</sub>O<sub>9</sub>)]·19.6 H<sub>2</sub>O (yield = 80.4 % based on Nb).

*Synthesis of Nb<sub>16</sub>Ge<sub>3</sub>-CO<sub>3</sub>:* Crystalline Nb<sub>16</sub>Ge<sub>3</sub>-CO<sub>3</sub> is synthesized by adding CsNb<sub>6</sub> (0.55 g, 1.5 mmol Nb, ~1 M Nb<sub>6</sub>) to 150 μL of DI H<sub>2</sub>O in a 4 mL vial, followed by the addition of 100 μL of 1 M Na<sub>4</sub>GeO<sub>4</sub> (0.4 M GeO<sub>4</sub><sup>4-</sup>, 0.10 mmol Ge). This gives a ratio of 15 Nb per 1 Ge. Upon adding the Na<sub>4</sub>GeO<sub>4</sub> solution, a white precipitate forms, which we hypothesize is the much less soluble sodium hexaniobate cluster (NaNb<sub>6</sub>). The solution is stirred briefly, then placed uncapped in a desiccator prefilled with dry ice and exposed to CO<sub>2</sub> for approximately 18 hours (overnight). After 18 hours, the initial precipitate redissolves, leaving the solution clear (**figure S1**). Colorless, rectangular crystals of Nb<sub>16</sub>Ge<sub>3</sub>-CO<sub>3</sub> begin to appear within 24-48 hours. The crystals are unstable and must be collected or analyzed within 48 hours of forming, or they tend to redissolve. Nb<sub>16</sub>Ge<sub>3</sub>-CO<sub>3</sub> is fully formulated as Cs<sub>21</sub>Na<sub>3</sub>[Nb<sub>7</sub>O<sub>22</sub>(NbO(CO<sub>3</sub>)<sub>2</sub>)<sub>9</sub>(Ge<sub>3</sub>O<sub>9</sub>)]·33.6 H<sub>2</sub>O (yield = 41.6 % based on Nb).

*Synthesis of Nb-Si gel:* Cs-Nb<sub>6</sub> (0.55 g, 1.5 mmol Nb) is dissolved in 250 μL of DI H<sub>2</sub>O (~1 M Nb<sub>6</sub>) in a 4 mL vial. The solution is heated for approximately 20 min on a 75 °C hot plate with constant stirring. Solid fumed silica (SiO<sub>2</sub>, 35 mg, 0.58 mmol Si) is added to the warm Cs-Nb<sub>6</sub> solution and stirred until fully dissolved (~10 minutes). This gives a ratio of approximately 3 Nb per 1 Si. The solution is then placed uncapped in a desiccator prefilled with dry ice and exposed to CO<sub>2</sub> for approximately 18 hours (overnight). After 18 hours, a

clear viscous solution remains. The vial is covered with parafilm, perforated with a needle, and left to dry on the benchtop. A translucent, wet gel forms within 24 to 48 hours on the benchtop. Upon further drying (~ 1 month), a translucent, solid monolith/disk forms. For ssNMR, the gel is dried in a 60 °C oven overnight, at which point the gel/solid turns opaque.

*Synthesis of Nb-Ge gel:* Cs-Nb<sub>6</sub> (0.55 g, 1.5 mmol Nb) is dissolved in 250 μL of DI H<sub>2</sub>O (~1 M Nb<sub>6</sub>) in a 4 mL vial. The solution is heated for approximately 20 min on a 75 °C hot plate with constant stirring. Solid germanium oxide (GeO<sub>2</sub>, 12 mg, 0.11 mmol Ge) is added to the warm Cs-Nb<sub>6</sub> solution and stirred until fully dissolved (~20 minutes). This gives a ratio of approximately 13 Nb per 1 Ge. The solution is then placed uncapped in a desiccator prefilled with dry ice and exposed to CO<sub>2</sub> for approximately 18 hours (overnight). After 18 hours, a clear viscous solution remains. The vial is covered with parafilm, perforated with a needle, and left to dry on the benchtop. A translucent, wet gel forms within 24 to 48 hours on the benchtop. Upon further drying (~ 1 month), a translucent, solid monolith/disk forms.

*Synthesis of Nb-PO<sub>4</sub> gel:* Cs-Nb<sub>6</sub> (0.55 g, 1.5 mmol Nb) is dissolved in 100 μL of DI H<sub>2</sub>O (~1 M Nb<sub>6</sub>) in a 4 mL vial, followed by the addition of 150 μL of 1.7 M Cs<sub>3</sub>PO<sub>4</sub> (~ 1 M PO<sub>4</sub><sup>3-</sup>, 0.25 mmol P). This gives a ratio of 6 Nb per 1 P. The solution is then placed uncapped in a desiccator prefilled with dry ice and exposed to CO<sub>2</sub> for approximately 18 hours (overnight). After 18 hours, a clear viscous solution remains. The vial is covered with parafilm, perforated with a needle, and left to dry on the benchtop. A translucent, wet gel forms within 24 to 48 hours on the benchtop. Upon further drying (~1 month), a translucent, solid monolith/disk forms. For ssNMR, the gel is dried in a 60 °C oven overnight, at which point the gel/solid turns opaque.

*Thin-film preparation:* The Nb-Si, Nb-Ge, and Nb-PO<sub>4</sub> all form extremely viscous solutions after 18 hours of CO<sub>2</sub>. Due to their viscosity, these samples could not be spin-coated for thin film measurements. However, the samples can be diluted by 50% before CO<sub>2</sub> exposure and still form gels, although at longer time intervals (~5 days). Therefore, the thin film samples were prepared as described above. Then, an additional 250 μL of DI water was added, and the samples were placed in the desiccator.

### 3. Precipitation of Na-Nb<sub>6</sub> before CO<sub>2</sub> infusion.

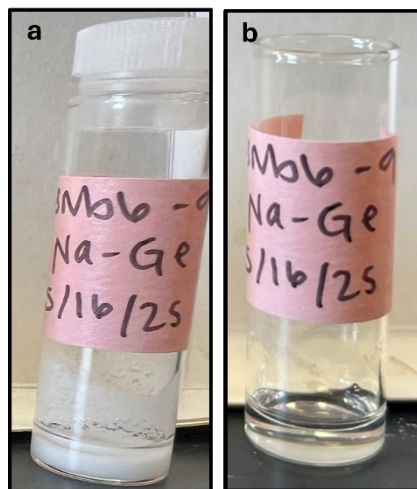

**Figure S1.** (a) precipitation of Na-Nb<sub>6</sub> when Na<sub>4</sub>GeO<sub>4</sub> is added, and (b) after CO<sub>2</sub> exposure the precipitate redissolves and the new Nb-POM that forms (Nb<sub>16</sub>Ge<sub>3</sub>-CO<sub>3</sub>) is more soluble than Nb<sub>6</sub> alone.

## 4. Crystallographic information.

**Table S1.** Crystallographic information for  $\text{Nb}_{16}\text{Si}_3\text{-CO}_3$ .

|                                               |                                                                                                                              |
|-----------------------------------------------|------------------------------------------------------------------------------------------------------------------------------|
| Identification                                | $\text{Nb}_{16}\text{Si}_3\text{-CO}_3$                                                                                      |
| CSD number                                    | 2494764                                                                                                                      |
| Empirical formula                             | $\text{C}_{18}\text{Cs}_{24}\text{Nb}_{16}\text{O}_{113.6}\text{Si}_3\text{H}_{39.2}$                                        |
| Moiety formula                                | $\text{Cs}_{24}[\text{Nb}_7\text{O}_{22}[\text{NbO}(\text{CO}_3)_2]_9(\text{Si}_3\text{O}_9)] \cdot 19.6 \text{H}_2\text{O}$ |
| Formula weight                                | 6833.51                                                                                                                      |
| Temperature/K                                 | 223(2)                                                                                                                       |
| Crystal system                                | monoclinic                                                                                                                   |
| Space group                                   | $C2/c$                                                                                                                       |
| a/Å                                           | 28.8284(4)                                                                                                                   |
| b/Å                                           | 16.3406(2)                                                                                                                   |
| c/Å                                           | 65.4933(7)                                                                                                                   |
| $\alpha/^\circ$                               | 90                                                                                                                           |
| $\beta/^\circ$                                | 92.4720(10)                                                                                                                  |
| $\gamma/^\circ$                               | 90                                                                                                                           |
| Volume/Å <sup>3</sup>                         | 30823.4(7)                                                                                                                   |
| Z                                             | 8                                                                                                                            |
| $\rho_{\text{calc}} \text{g/cm}^3$            | 2.945                                                                                                                        |
| $\mu/\text{mm}^{-1}$                          | 54.034                                                                                                                       |
| F(000)                                        | 24590                                                                                                                        |
| Crystal size/mm <sup>3</sup>                  | $0.16 \times 0.01 \times 0.005$                                                                                              |
| Radiation                                     | $\text{CuK}\alpha$ ( $\lambda = 1.54184$ )                                                                                   |
| $2\Theta$ range for data collection/ $^\circ$ | 5.402 to 102.028                                                                                                             |
| Index ranges                                  | $-25 \leq h \leq 28, -16 \leq k \leq 16, -63 \leq l \leq 65$                                                                 |
| Reflections collected                         | 100056                                                                                                                       |
| Independent reflections                       | 16398 [ $R_{\text{int}} = 0.2324, R_{\text{sigma}} = 0.1091$ ]                                                               |
| Data/restraints/parameters                    | 16398/6615/1740                                                                                                              |
| Goodness-of-fit on $F^2$                      | 1.337                                                                                                                        |
| Final R indexes [ $I \geq 2\sigma(I)$ ]       | $R_1 = 0.1178, wR_2 = 0.3254$                                                                                                |
| Final R indexes [all data]                    | $R_1 = 0.1292, wR_2 = 0.3366$                                                                                                |
| Largest diff. peak/hole / $e \text{Å}^{-3}$   | 3.55/-3.38                                                                                                                   |

**Table S2.** Crystallographic information for **Nb<sub>16</sub>Ge<sub>3</sub>-CO<sub>3</sub>**.

|                                             |                                                                                                                                                                               |
|---------------------------------------------|-------------------------------------------------------------------------------------------------------------------------------------------------------------------------------|
| Identification                              | Nb <sub>16</sub> Ge <sub>3</sub> -CO <sub>3</sub>                                                                                                                             |
| CSD number                                  | 2494765                                                                                                                                                                       |
| Empirical formula                           | O <sub>127.56</sub> Ge <sub>3</sub> Nb <sub>16</sub> C <sub>18</sub> Cs <sub>21</sub> Na <sub>3</sub> H <sub>67.12</sub>                                                      |
| Moiety formula                              | Cs <sub>21</sub> Na <sub>3</sub> [Nb <sub>7</sub> O <sub>22</sub> [NbO(CO <sub>3</sub> ) <sub>2</sub> ] <sub>9</sub> (Ge <sub>3</sub> O <sub>9</sub> )]·33.6 H <sub>2</sub> O |
| Formula weight                              | 6889.12                                                                                                                                                                       |
| Temperature/K                               | 173(2)                                                                                                                                                                        |
| Crystal system                              | triclinic                                                                                                                                                                     |
| Space group                                 | P-1                                                                                                                                                                           |
| a/Å                                         | 15.6974(2)                                                                                                                                                                    |
| b/Å                                         | 22.9741(4)                                                                                                                                                                    |
| c/Å                                         | 23.8925(3)                                                                                                                                                                    |
| α/°                                         | 107.0550(10)                                                                                                                                                                  |
| β/°                                         | 93.7840(10)                                                                                                                                                                   |
| γ/°                                         | 93.1270(10)                                                                                                                                                                   |
| Volume/Å <sup>3</sup>                       | 8194.9(2)                                                                                                                                                                     |
| Z                                           | 2                                                                                                                                                                             |
| ρ <sub>calc</sub> g/cm <sup>3</sup>         | 2.792                                                                                                                                                                         |
| μ/mm <sup>-1</sup>                          | 46.254                                                                                                                                                                        |
| F(000)                                      | 6271                                                                                                                                                                          |
| Crystal size/mm <sup>3</sup>                | 0.1 × 0.05 × 0.01                                                                                                                                                             |
| Radiation                                   | CuKα (λ = 1.54184)                                                                                                                                                            |
| 2θ range for data collection/°              | 5.66 to 101.864                                                                                                                                                               |
| Index ranges                                | -15 ≤ h ≤ 15, -23 ≤ k ≤ 22, -23 ≤ l ≤ 23                                                                                                                                      |
| Reflections collected                       | 57340                                                                                                                                                                         |
| Independent reflections                     | 17293 [R <sub>int</sub> = 0.0922, R <sub>sigma</sub> = 0.0728]                                                                                                                |
| Data/restraints/parameters                  | 17293/6447/1860                                                                                                                                                               |
| Goodness-of-fit on F <sup>2</sup>           | 1.033                                                                                                                                                                         |
| Final R indexes [I ≥ 2σ (I)]                | R <sub>1</sub> = 0.0963, wR <sub>2</sub> = 0.2859                                                                                                                             |
| Final R indexes [all data]                  | R <sub>1</sub> = 0.1108, wR <sub>2</sub> = 0.3017                                                                                                                             |
| Largest diff. peak/hole / e Å <sup>-3</sup> | 2.53/-2.61                                                                                                                                                                    |

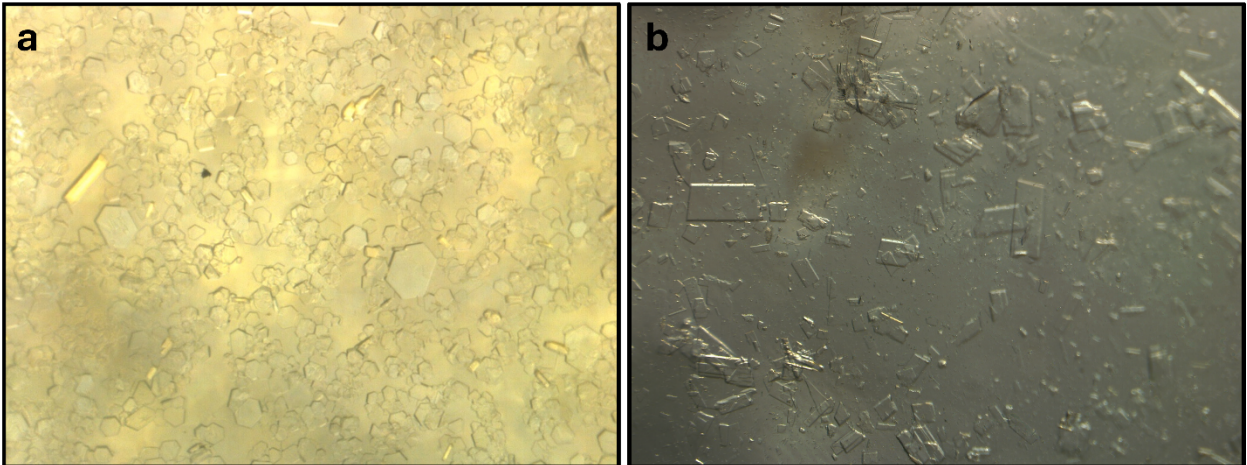

**Figure S2.** Microscope images of (a)  $\text{Nb}_{16}\text{Si}_3\text{-CO}_3$  and (b)  $\text{Nb}_{16}\text{Ge}_3\text{-CO}_3$ , showing their different morphologies.

**Table S3.** Bond valences (BVS) of  $\text{Nb}_{16}\text{Si}_3\text{-CO}_3$  with the coordination number and atom site.

| Atom | BVS  | coordination number | site description                                                         |
|------|------|---------------------|--------------------------------------------------------------------------|
| NB1  | 4.95 | 6                   | $\text{Nb}_7$ unit connected to hexaniobate and chains                   |
| NB2  | 5.07 | 6                   | hexaniobate Nb-atom connected to chains                                  |
| NB3  | 5.08 | 6                   | hexaniobate Nb-atom connected to chains                                  |
| NB4  | 5.00 | 6                   | hexaniobate Nb-atom connected to chains                                  |
| NB5  | 4.96 | 7                   | Nb-atom within the chains/tentacles (part of $\text{Nb}_{10}$ plane)     |
| NB6  | 5.24 | 7                   | Nb-atom within the chains/tentacles (part of $\text{Nb}_{10}$ plane)     |
| NB7  | 5.01 | 7                   | Nb-atom within the chains/tentacles (part of $\text{Nb}_{10}$ plane)     |
| NB8  | 4.86 | 6                   | hexaniobate Nb-atom with a terminal 'yl' oxo                             |
| NB9  | 5.02 | 7                   | Nb-atom within the chains/tentacles                                      |
| NB10 | 4.93 | 6                   | hexaniobate Nb-atom with a terminal 'yl' oxo                             |
| NB11 | 5.15 | 7                   | Nb-atom within the chains/tentacles                                      |
| NB12 | 5.31 | 7                   | Nb-atom within the chains/tentacles                                      |
| NB13 | 4.98 | 6                   | hexaniobate Nb-atom with a terminal 'yl' oxo                             |
| NB14 | 5.20 | 7                   | Nb-atom within the chains/tentacles                                      |
| NB15 | 5.03 | 7                   | Nb-atom within the chains/tentacles                                      |
| NB16 | 4.95 | 7                   | Nb-atom within the chains/tentacles                                      |
| SI1  | 4.08 | 4                   | part of $\text{Si}_3\text{O}_9$ cyclic trimer                            |
| SI2  | 4.01 | 4                   |                                                                          |
| SI3  | 4.18 | 4                   |                                                                          |
| O10  | 2.01 |                     | $\mu_2$ bridge connecting chains/tentacles to Si cyclic trimer (Nb-O-Si) |
| O15  | 2.04 |                     |                                                                          |
| O16  | 2.03 |                     |                                                                          |

|     |      |  |
|-----|------|--|
| O17 | 2.00 |  |
| O30 | 1.95 |  |
| O35 | 1.86 |  |
| O19 | 1.94 |  |
| O20 | 2.18 |  |
| O22 | 2.29 |  |
|     | 1.94 |  |
| O24 |      |  |
|     | 1.76 |  |
| O25 |      |  |
| O27 | 2.22 |  |
| O28 | 1.80 |  |
| O29 | 2.16 |  |
| O32 | 1.68 |  |
| O33 | 1.96 |  |
| O38 | 1.67 |  |
| O40 | 2.29 |  |
| O42 | 2.06 |  |
| O43 | 1.85 |  |
| O44 | 1.87 |  |
| O45 | 1.79 |  |
| O48 | 1.99 |  |
| O49 | 2.11 |  |
| O50 | 1.91 |  |
| O51 | 1.82 |  |
| O53 | 1.79 |  |
| O54 | 1.82 |  |
| O55 | 1.74 |  |
| O56 | 2.14 |  |
| O58 | 1.90 |  |
| O61 | 2.11 |  |
| O62 | 2.41 |  |
| O69 | 1.82 |  |
| O71 | 1.90 |  |
| O74 | 2.01 |  |
| O75 | 2.27 |  |
| O76 | 2.07 |  |
| O78 | 1.51 |  |
| O80 | 2.14 |  |

chelating O-atom from carbonate (Nb-O-C)

|     |      |  |                                                                                                               |
|-----|------|--|---------------------------------------------------------------------------------------------------------------|
| O82 | 1.97 |  |                                                                                                               |
| O87 | 2.13 |  |                                                                                                               |
| O7  | 1.99 |  |                                                                                                               |
| O9  | 2.03 |  | $\mu_2$ bridging O atom (Si-O-Si)                                                                             |
| O12 | 1.94 |  |                                                                                                               |
| O2  | 1.91 |  | $\mu_2$ Nb-O-Nb bridge connecting Nb <sub>7</sub> unit to hexaniobate                                         |
| O3  | 1.90 |  | $\mu_2$ Nb-O-Nb bridge connecting Nb <sub>7</sub> unit to Nb in chains (Nb <sub>10</sub> plane)               |
| O4  | 1.87 |  | $\mu_2$ Nb-O-Nb bridge connecting Nb <sub>7</sub> unit to Nb in chains (Nb <sub>10</sub> plane)               |
| O5  | 1.96 |  | $\mu_2$ Nb-O-Nb bridge in chain/tentacle                                                                      |
| O6  | 1.90 |  | Nb-O-Nb bridge connecting Nb <sub>7</sub> unit to Nb in chains (Nb <sub>10</sub> plane)                       |
| O8  | 1.65 |  | $\mu_2$ Nb-O-Nb bridge in hexaniobate                                                                         |
| O11 | 1.89 |  | Nb-O-Nb bridge connecting Nb <sub>7</sub> unit to hexaniobate                                                 |
| O13 | 1.94 |  | Nb-O-Nb bridge connecting Nb <sub>7</sub> unit to hexaniobate                                                 |
| O14 | 1.81 |  | $\mu_2$ Nb-O-Nb bridge in hexaniobate                                                                         |
| O18 | 1.81 |  | $\mu_2$ Nb-O-Nb bridge in hexaniobate                                                                         |
| O21 | 1.84 |  | $\mu_2$ Nb-O-Nb bridge in hexaniobate                                                                         |
| O23 | 1.77 |  | $\mu_2$ Nb-O-Nb bridge in hexaniobate                                                                         |
| O26 | 1.85 |  | $\mu_2$ Nb-O-Nb bridge in hexaniobate                                                                         |
| O31 | 1.70 |  | $\mu_2$ Nb-O-Nb bridge in hexaniobate                                                                         |
| O34 | 1.80 |  | $\mu_2$ Nb-O-Nb bridge in hexaniobate                                                                         |
| O36 | 1.82 |  | Terminal Nb=O in hexaniobate                                                                                  |
| O37 | 1.56 |  | Terminal Nb=O in hexaniobate                                                                                  |
| O39 | 1.92 |  | $\mu_2$ Nb-O-Nb bridge connecting Nb of hexaniobate to Nb of chain/tentacle (w/in the Nb <sub>10</sub> plane) |
| O41 | 1.77 |  | $\mu_6$ O-atom in center of hexaniobate                                                                       |
| O46 | 1.85 |  | $\mu_2$ Nb-O-Nb bridge in chain/tentacle                                                                      |
| O47 | 1.90 |  | $\mu_2$ Nb-O-Nb bridge in hexaniobate                                                                         |
| O52 | 1.82 |  | $\mu_2$ Nb-O-Nb bridge connecting Nb of hexaniobate to Nb of chain/tentacle (w/in the Nb <sub>10</sub> plane) |
| O59 | 1.84 |  | Terminal Nb=O at the end of chain/tentacle                                                                    |
| O60 | 1.73 |  | Terminal Nb=O in hexaniobate                                                                                  |
| O63 | 1.80 |  | $\mu_2$ Nb-O-Nb bridge in chain/tentacle                                                                      |

|      |      |  |                                                                                                               |
|------|------|--|---------------------------------------------------------------------------------------------------------------|
| O64  | 1.97 |  | $\mu_2$ Nb-O-Nb bridge in chain/tentacle                                                                      |
| O65  | 1.59 |  | Terminal Nb=O at the end of chain/tentacle                                                                    |
| O68  | 1.72 |  | Terminal Nb=O at the end of chain/tentacle                                                                    |
| O72  | 1.92 |  | $\mu_2$ Nb-O-Nb bridge connecting Nb of hexaniobate to Nb of chain/tentacle (w/in the Nb <sub>10</sub> plane) |
| O73  | 1.87 |  | $\mu_2$ Nb-O-Nb bridge in chain/tentacle                                                                      |
| O77  | 1.92 |  | $\mu_2$ Nb-O-Nb bridge in chain/tentacle                                                                      |
| O67  | 1.99 |  |                                                                                                               |
| O79  | 1.76 |  |                                                                                                               |
| O81  | 1.85 |  |                                                                                                               |
| O83  | 1.81 |  |                                                                                                               |
| O85  | 2.02 |  |                                                                                                               |
| O86  | 1.97 |  |                                                                                                               |
| O88  | 1.84 |  |                                                                                                               |
| O90  | 1.57 |  |                                                                                                               |
| O91  | 2.06 |  |                                                                                                               |
| O94  | 1.77 |  | O-atom of C=O carbonate                                                                                       |
| O97  | 1.60 |  |                                                                                                               |
| O99  | 1.60 |  |                                                                                                               |
| O100 | 1.83 |  |                                                                                                               |
| O103 | 1.63 |  |                                                                                                               |
| O107 | 1.54 |  |                                                                                                               |
| O108 | 1.74 |  |                                                                                                               |
| O109 | 1.65 |  |                                                                                                               |
| O110 | 1.59 |  |                                                                                                               |

**Table S4.** Bond valences (BVS) of Nb<sub>16</sub>Ge<sub>3</sub>-CO<sub>3</sub> with the coordination number and atom site.

| Atom | BVS  | coordination number | site description                                                     |
|------|------|---------------------|----------------------------------------------------------------------|
| Nb1  | 4.84 | 6                   | hexaniobate Nb-atom with a terminal 'yl' oxo                         |
| Nb2  | 5.16 | 6                   | hexaniobate Nb-atom with a terminal 'yl' oxo                         |
| Nb3  | 5.01 | 6                   | hexaniobate Nb-atom with a terminal 'yl' oxo                         |
| Nb4  | 4.79 | 6                   | hexaniobate Nb-atom connected to chains                              |
| Nb5  | 4.83 | 7                   | hexaniobate Nb-atom connected to chains                              |
| Nb6  | 4.87 | 7                   | hexaniobate Nb-atom connected to chains                              |
| Nb7  | 5.03 | 7                   | Nb <sub>7</sub> unit connected to hexaniobate and chains             |
| Nb8  | 4.99 | 6                   | Nb-atom within the chains/tentacles (part of Nb <sub>10</sub> plane) |

|      |      |   |                                                                          |
|------|------|---|--------------------------------------------------------------------------|
| Nb9  | 5.20 | 7 | Nb-atom within the chains/tentacles (part of Nb <sub>10</sub> plane)     |
| Nb10 | 5.10 | 6 | Nb-atom within the chains/tentacles (part of Nb <sub>10</sub> plane)     |
| Nb11 | 5.06 | 7 | Nb-atom within the chains/tentacles                                      |
| Nb12 | 5.05 | 7 | Nb-atom within the chains/tentacles                                      |
| Nb13 | 5.13 | 6 | Nb-atom within the chains/tentacles                                      |
| Nb14 | 5.14 | 7 | Nb-atom within the chains/tentacles                                      |
| Nb15 | 4.99 | 7 | Nb-atom within the chains/tentacles                                      |
| Nb16 | 5.35 | 7 | Nb-atom within the chains/tentacles                                      |
| Ge1  | 4.38 | 4 | part of Ge <sub>3</sub> O <sub>9</sub> cyclic trimer                     |
| Ge2  | 4.19 | 4 |                                                                          |
| Ge3  | 3.98 | 4 |                                                                          |
| O9   | 2.09 |   | $\mu_2$ bridge connecting chains/tentacles to Ge cyclic trimer (Nb-O-Ge) |
| O10  | 1.86 |   |                                                                          |
| O14  | 1.91 |   |                                                                          |
| O18  | 2.00 |   |                                                                          |
| O43  | 1.97 |   |                                                                          |
| O86  | 1.92 |   |                                                                          |
| O7   | 1.90 |   | chelating O-atom from carbonate (Nb-O-C)                                 |
| O8   | 1.87 |   |                                                                          |
| O11  | 1.83 |   |                                                                          |
| O16  | 1.88 |   |                                                                          |
| O17  | 1.86 |   |                                                                          |
| O19  | 1.86 |   |                                                                          |
| O20  | 1.98 |   |                                                                          |
| O23  | 1.71 |   |                                                                          |
| O24  | 1.82 |   |                                                                          |
| O27  | 2.01 |   |                                                                          |
| O29  | 1.91 |   |                                                                          |
| O32  | 2.08 |   |                                                                          |
| O44  | 1.71 |   |                                                                          |
| O45  | 1.79 |   |                                                                          |
| O55  | 1.68 |   |                                                                          |
| O57  | 2.00 |   |                                                                          |
| O58  | 1.77 |   |                                                                          |

|      |      |  |                                                                                                               |
|------|------|--|---------------------------------------------------------------------------------------------------------------|
| O59  | 1.83 |  |                                                                                                               |
| O60  | 2.23 |  |                                                                                                               |
| O64  | 2.01 |  |                                                                                                               |
| O65  | 2.09 |  |                                                                                                               |
| O68  | 1.85 |  |                                                                                                               |
| O69  | 1.86 |  |                                                                                                               |
| O70  | 2.36 |  |                                                                                                               |
| O71  | 1.88 |  |                                                                                                               |
| O72  | 1.79 |  |                                                                                                               |
| O74  | 1.88 |  |                                                                                                               |
| O76  | 2.00 |  |                                                                                                               |
| O77  | 2.00 |  |                                                                                                               |
| O79  | 1.93 |  |                                                                                                               |
| O89  | 1.93 |  |                                                                                                               |
| O91  | 1.89 |  |                                                                                                               |
| O94  | 1.81 |  |                                                                                                               |
| O99  | 2.12 |  |                                                                                                               |
| O100 | 1.98 |  |                                                                                                               |
| O106 | 2.15 |  |                                                                                                               |
| O12  | 2.00 |  |                                                                                                               |
| O13  | 2.07 |  | $\mu_2$ bridging O atom (Ge-O-Ge)                                                                             |
| O15  | 1.95 |  |                                                                                                               |
| O1   | 1.86 |  | Nb-O-Nb bridge connecting Nb <sub>7</sub> to Nb in chains (Nb <sub>10</sub> )                                 |
| O3   | 1.89 |  | Nb-O-Nb bridge connecting Nb <sub>7</sub> to Nb in chains (Nb <sub>10</sub> )                                 |
| O5   | 1.80 |  | Nb-O-Nb bridge connecting Nb <sub>7</sub> to hexaniobate                                                      |
| O6   | 1.84 |  | Nb-O-Nb bridge connecting Nb <sub>7</sub> to Nb in chains (Nb <sub>10</sub> )                                 |
| O22  | 1.75 |  | Terminal Nb=O at the end of chain/tentacle                                                                    |
| O25  | 1.73 |  | $\mu_6$ O-atom in center of hexaniobate                                                                       |
| O26  | 1.67 |  | Nb-O-Nb bridge in hexaniobate                                                                                 |
| O31  | 1.72 |  | Nb-O-Nb bridge in hexaniobate                                                                                 |
| O40  | 1.72 |  | Terminal Nb=O at the end of chain/tentacle                                                                    |
| O46  | 1.84 |  | Nb-O-Nb bridge in chain/tentacle                                                                              |
| O48  | 1.90 |  | Nb-O-Nb bridge connecting Nb <sub>7</sub> to hexaniobate                                                      |
| O49  | 1.77 |  | Nb-O-Nb bridge in hexaniobate                                                                                 |
| O51  | 1.83 |  | $\mu_2$ Nb-O-Nb bridge connecting Nb of hexaniobate to Nb of chain/tentacle (w/in the Nb <sub>10</sub> plane) |
| O52  | 1.78 |  | Nb-O-Nb bridge in hexaniobate                                                                                 |
| O54  | 1.98 |  | Nb-O-Nb bridge in chain/tentacle                                                                              |

|      |      |  |                                                                                                               |
|------|------|--|---------------------------------------------------------------------------------------------------------------|
| O56  | 1.45 |  | Terminal Nb=O in hexaniobate                                                                                  |
| O61  | 1.80 |  | Nb-O-Nb bridge in hexaniobate                                                                                 |
| O62  | 1.77 |  | Nb-O-Nb bridge in hexaniobate                                                                                 |
| O66  | 2.03 |  | Nb-O-Nb bridge in chain/tentacle                                                                              |
| O78  | 1.55 |  | Terminal Nb=O in hexaniobate                                                                                  |
| O80  | 1.93 |  | Nb-O-Nb bridge in chain/tentacle                                                                              |
| O83  | 1.71 |  | Nb-O-Nb bridge in hexaniobate                                                                                 |
| O84  | 1.74 |  | Nb-O-Nb bridge in hexaniobate                                                                                 |
| O85  | 1.47 |  | Terminal Nb=O in hexaniobate                                                                                  |
| O88  | 1.84 |  | $\mu_2$ Nb-O-Nb bridge connecting Nb of hexaniobate to Nb of chain/tentacle (w/in the Nb <sub>10</sub> plane) |
| O90  | 1.88 |  | Nb-O-Nb bridge connecting Nb <sub>7</sub> to hexaniobate                                                      |
| O92  | 1.90 |  | Nb-O-Nb bridge in chain/tentacle                                                                              |
| O95  | 1.75 |  | $\mu_2$ Nb-O-Nb bridge connecting Nb of hexaniobate to Nb of chain/tentacle (w/in the Nb <sub>10</sub> plane) |
| O96  | 1.53 |  | Terminal Nb=O at the end of chain/tentacle                                                                    |
| O97  | 1.76 |  | Nb-O-Nb bridge in hexaniobate                                                                                 |
| O102 | 1.97 |  | Nb-O-Nb bridge in chain/tentacle                                                                              |
| O28  | 1.60 |  |                                                                                                               |
| O30  | 1.68 |  |                                                                                                               |
| O33  | 1.85 |  |                                                                                                               |
| O36  | 1.80 |  |                                                                                                               |
| O37  | 1.68 |  |                                                                                                               |
| O38  | 1.38 |  |                                                                                                               |
| O39  | 1.78 |  |                                                                                                               |
| O41  | 1.59 |  |                                                                                                               |
| O42  | 1.85 |  |                                                                                                               |
| O50  | 1.65 |  | O-atom of C=O carbonate                                                                                       |
| O53  | 1.67 |  |                                                                                                               |
| O73  | 1.88 |  |                                                                                                               |
| O75  | 1.68 |  |                                                                                                               |
| O87  | 1.92 |  |                                                                                                               |
| O93  | 1.87 |  |                                                                                                               |
| O98  | 2.02 |  |                                                                                                               |
| O104 | 1.88 |  |                                                                                                               |
| O107 | 1.90 |  |                                                                                                               |

**Table S5.** Comparison of the Si-O and Ge-O bond distances in the **Nb<sub>16</sub>Si<sub>3</sub>-CO<sub>3</sub>** and **Nb<sub>16</sub>Ge<sub>3</sub>-CO<sub>3</sub>** phases to the previously reported Cs<sub>6</sub>Si<sub>3</sub>O<sub>9</sub> and Cs<sub>6</sub>Ge<sub>3</sub>O<sub>9</sub> phases.<sup>5,6</sup> The Si-O and Ge-O bond distances for **Nb<sub>16</sub>Si<sub>3</sub>-CO<sub>3</sub>** and **Nb<sub>16</sub>Ge<sub>3</sub>-CO<sub>3</sub>** fall within the error of the literature values.

| Sample                                              | Atom 1 | Atom 2 | Distance (1,2) Å | Average distance (Å) |
|-----------------------------------------------------|--------|--------|------------------|----------------------|
| <b>Nb<sub>16</sub>Si<sub>3</sub>-CO<sub>3</sub></b> | Si3    | O15    | 1.583            | 1.62 ± 0.0178        |
|                                                     | Si1    | O17    | 1.599            |                      |
|                                                     | Si2    | O9     | 1.600            |                      |
|                                                     | Si3    | O30    | 1.607            |                      |
|                                                     | Si3    | O7     | 1.609            |                      |
|                                                     | Si1    | O16    | 1.612            |                      |
|                                                     | Si2    | O10    | 1.613            |                      |
|                                                     | Si1    | O12    | 1.622            |                      |
|                                                     | Si3    | O9     | 1.629            |                      |
|                                                     | Si1    | O7     | 1.636            |                      |
|                                                     | Si2    | O35    | 1.638            |                      |
|                                                     | Si2    | O12    | 1.641            |                      |
| Cs <sub>6</sub> Si <sub>3</sub> O <sub>9</sub>      | Si3    | O8     | 1.584            | 1.63 ± 0.0405        |
|                                                     | Si1    | O5     | 1.595            |                      |
|                                                     | Si2    | O7     | 1.596            |                      |
|                                                     | Si3    | O9     | 1.597            |                      |
|                                                     | Si2    | O6     | 1.599            |                      |
|                                                     | Si1    | O4     | 1.604            |                      |
|                                                     | Si3    | O2     | 1.661            |                      |
|                                                     | Si2    | O1     | 1.668            |                      |
|                                                     | Si1    | O1     | 1.674            |                      |
|                                                     | Si3    | O3     | 1.675            |                      |
|                                                     | Si1    | O3     | 1.674            |                      |
|                                                     | Si2    | O2     | 1.682            |                      |
| <b>Nb<sub>16</sub>Ge<sub>3</sub>-CO<sub>3</sub></b> | Ge1    | O9     | 1.673            | 1.73 ± 0.0313        |
|                                                     | Ge1    | O18    | 1.693            |                      |
|                                                     | Ge2    | O43    | 1.697            |                      |
|                                                     | Ge2    | O13    | 1.720            |                      |
|                                                     | Ge1    | O12    | 1.727            |                      |
|                                                     | Ge3    | O10    | 1.735            |                      |
|                                                     | Ge3    | O86    | 1.745            |                      |
|                                                     | Ge2    | O15    | 1.749            |                      |
|                                                     | Ge3    | O13    | 1.753            |                      |
|                                                     | Ge1    | O15    | 1.764            |                      |
|                                                     | Ge2    | O14    | 1.765            |                      |

|                                                |     |     |       |               |
|------------------------------------------------|-----|-----|-------|---------------|
|                                                | Ge3 | O12 | 1.769 |               |
|                                                | Ge3 | O8  | 1.716 |               |
|                                                | Ge1 | O4  | 1.718 |               |
|                                                | Ge1 | O5  | 1.724 |               |
|                                                | Ge2 | O7  | 1.725 |               |
|                                                | Ge2 | O6  | 1.725 |               |
| Cs <sub>6</sub> Ge <sub>3</sub> O <sub>9</sub> | Ge3 | O9  | 1.731 | 1.76 ± 0.0422 |
|                                                | Ge2 | O1  | 1.791 |               |
|                                                | Ge2 | O2  | 1.792 |               |
|                                                | Ge1 | O3  | 1.798 |               |
|                                                | Ge3 | O3  | 1.802 |               |
|                                                | Ge1 | O1  | 1.813 |               |
|                                                | Ge3 | O2  | 1.818 |               |

**Table S6.** Bond angles of the Nb-O-Nb in the tentacles that are bridged to the silicate or germanate trimer (**figure 1e**). The Nb-O-Nb bond angle is larger, on average, for  $\text{Nb}_{16}\text{Ge}_3\text{-CO}_3$  due to germanate's (Ge(IV)) larger ionic radius (0.39 Å versus 0.26 Å for Si(IV)).

| Sample                                  | Atoms (1, 2, 3)        | Angle (°) |
|-----------------------------------------|------------------------|-----------|
| $\text{Nb}_{16}\text{Si}_3\text{-CO}_3$ | Nb16, O63, Nb15        | 142.8     |
|                                         | Nb14, O73, Nb9         | 146.1     |
|                                         | Nb12, O46, Nb11        | 145.6     |
|                                         | average bond angle (°) | 144.8     |
| $\text{Nb}_{16}\text{Ge}_3\text{-CO}_3$ | Nb0K, O01Q, Nb0M       | 149.5     |
|                                         | Nb0B, O01X, Nb0R       | 151.9     |
|                                         | Nb0G, O02U, Nb0H       | 149.5     |
|                                         | average bond angle (°) | 150.3     |

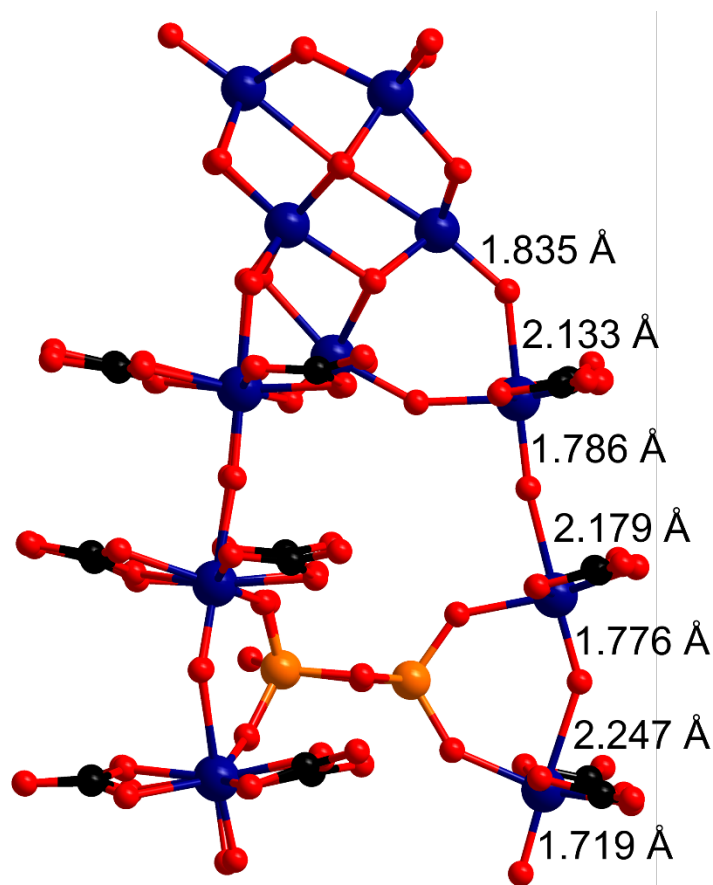

**Figure S3.** Preservation of the Jahn-Teller distortion down the tentacles of the jellyfish.

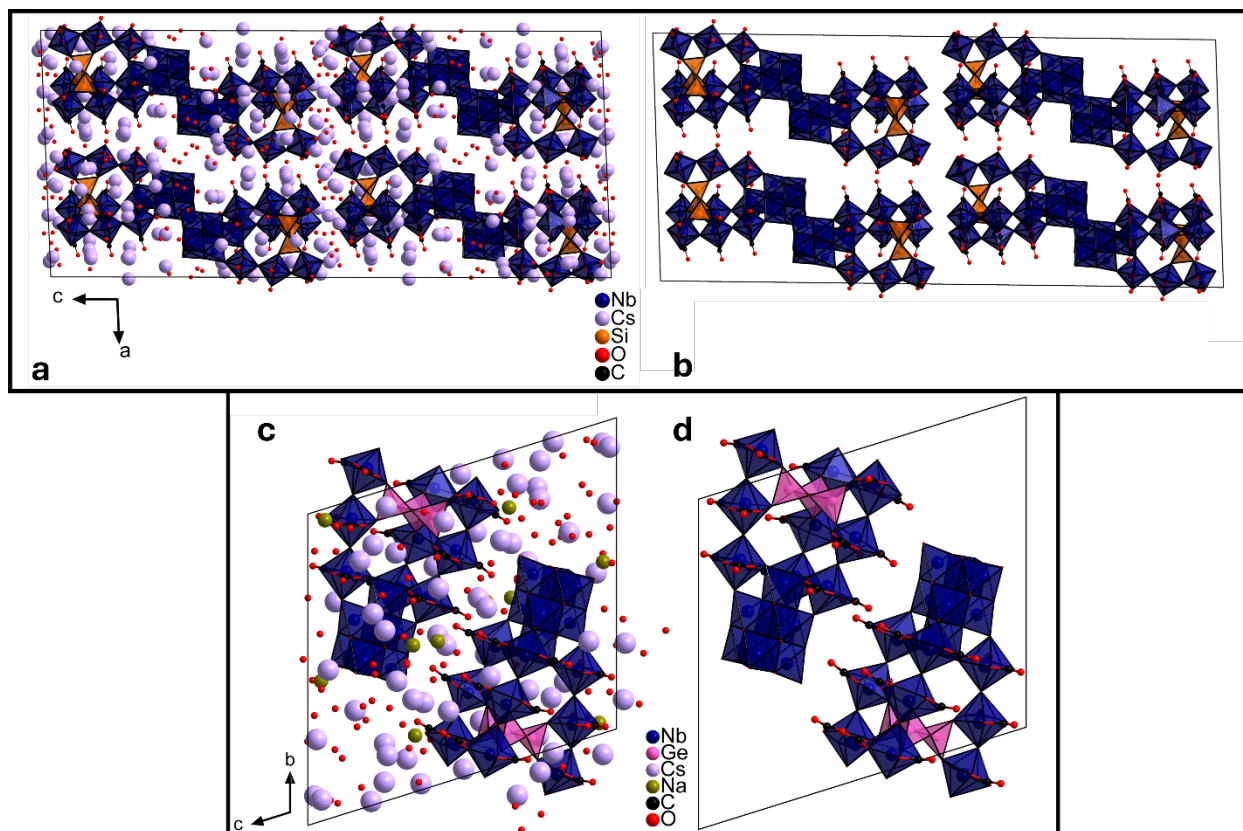

**Figure S4.** (a) and (b) the unit cell packing arrangement of  $\text{Nb}_{16}\text{Si}_3\text{-CO}_3$ , viewed along the  $b$ -axis, with (a) depicting the counteranions ( $\text{Cs}^+$ ) and lattice water (H-atoms omitted for clarity). (c) and (d) the unit cell packing of  $\text{Nb}_{16}\text{Ge}_3\text{-CO}_3$  viewed along the  $a$ -axis with (c) showing the counteranions ( $\text{Cs}^+$ ,  $\text{Na}^+$ ) and lattice water (H-atoms omitted for clarity).

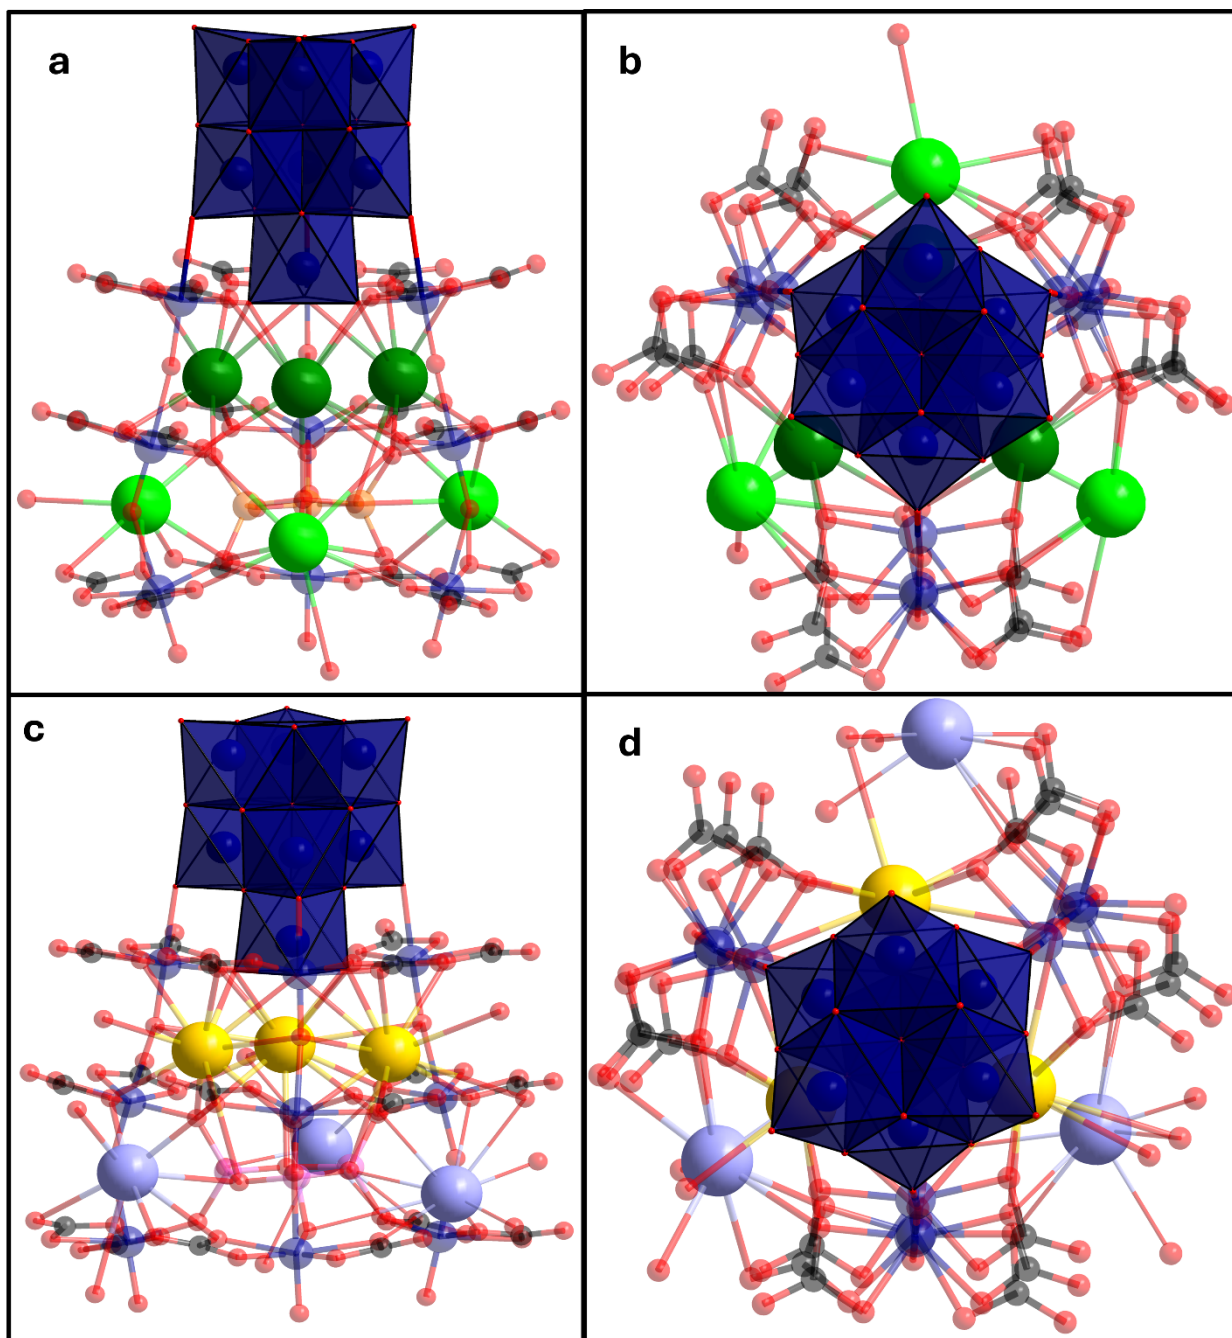

**Figure S5.** The crown-like arrangement of Cs<sup>+</sup> counteranions, tucked up within the tentacles of the jellyfish structures for (a, b)  $\text{Nb}_{16}\text{Si}_3\text{-CO}_3$  (Cs atoms in dark and light green) and (c, d)  $\text{Nb}_{16}\text{Ge}_3\text{-CO}_3$  (Cs atoms in yellow and light purple). The Cs environment in both structures is similar, showing its importance for crystallization.

**Table S7.** Detailed Cs-O bond lengths and Cs coordination number for **Nb<sub>16</sub>Si<sub>3</sub>-CO<sub>3</sub>** and **Nb<sub>16</sub>Ge<sub>3</sub>-CO<sub>3</sub>**, showing the similarities between the Cs bonding environments.

| Sample                                              | Atom 1      | Atom 2 | average bond length (Å) | Cs coordination number |
|-----------------------------------------------------|-------------|--------|-------------------------|------------------------|
| <b>Nb<sub>16</sub>Si<sub>3</sub>-CO<sub>3</sub></b> | <b>Cs1</b>  | O43    | 3.33                    | 11                     |
|                                                     | <b>Cs2</b>  | O38    | 3.30                    | 11                     |
|                                                     | <b>Cs3</b>  | O33    | 3.29                    | 11                     |
|                                                     | <b>Cs14</b> | O78    | 3.56                    | 9                      |
|                                                     | <b>Cs22</b> | O123   | 3.42                    | 10                     |
|                                                     | <b>Cs24</b> | O61    | 3.51                    | 8                      |
|                                                     |             |        | avg. bond length        | avg coord. number      |
|                                                     |             | 3.4    | 10.0                    |                        |
| <b>Nb<sub>16</sub>Ge<sub>3</sub>-CO<sub>3</sub></b> | <b>Cs1</b>  | O71    | 3.39                    | 12                     |
|                                                     | <b>Cs2</b>  | O16    | 3.28                    | 12                     |
|                                                     | <b>Cs3</b>  | O8     | 3.38                    | 13                     |
|                                                     | <b>Cs10</b> | O91    | 3.29                    | 9                      |
|                                                     | <b>Cs14</b> | O67    | 3.29                    | 9                      |
|                                                     | <b>Cs16</b> | O203   | 3.34                    | 9                      |
|                                                     |             |        | avg. bond length        | avg coord. number      |
|                                                     |             | 3.3    | 10.7                    |                        |

## 5. $^{133}\text{Cs}$ NMR Spectroscopy.

**Table S8.** Summary of the  $^{133}\text{Cs}$  ssNMR experimental parameters.

| Figure    | Compound                                | $B_0$ (T) | MAS (kHz) | Recycle Delay (s) | # of scans | Exp. Time (hr) |
|-----------|-----------------------------------------|-----------|-----------|-------------------|------------|----------------|
| Figure 3b | $\text{Nb}_{16}\text{Si}_3\text{-CO}_3$ | 9.4       | 10        | 1.3               | 1670       | 0.6            |
| Figure 3b | Nb-Si gel                               | 9.4       | 10        | 1.3               | 10240      | 3.7            |
| Figure S6 | $\text{Nb}_{16}\text{Si}_3\text{-CO}_3$ | 14.1      | 10        | 20                | 512        | 2.8            |
| Figure S7 | Nb- $\text{PO}_4$ gel                   | 14.1      | 10        | 40 <sup>a</sup>   | 512        | 5.7            |
| Figure S7 | Nb- $\text{PO}_4$ dry gel               | 14.1      | 10        | 60 <sup>b</sup>   | 512        | 8.5            |

<sup>a</sup>The maximum recycle delay was 40 s. A series of NMR experiment were acquired under the same conditions using a recycle delay of 40 s, 10 s, and 0.1 s.

<sup>b</sup>The maximum recycle delay was 40 s. A series of NMR experiment were acquired under the same conditions using a recycle delay of 60 s, 10 s, and 0.1 s.

**Table S9.** Solution  $^{133}\text{Cs}$  NMR summary of peak positions and full width at half maximum (FWHM).

| Sample                                                              | peak position (ppm)<br>[FWHM, Hz] | peak position (ppm)<br>[FWHM, Hz] |
|---------------------------------------------------------------------|-----------------------------------|-----------------------------------|
| 0.1 M $\text{CsNO}_3$                                               | 0 [2.172]                         |                                   |
| 0.1 M $\text{Cs}_8\text{Nb}_6\text{O}_{19}$                         | 21.2766 [3.743]                   |                                   |
| $\text{Cs}_4\text{SiO}_4$ (pH 14)                                   | 24.0420 [1.416]                   |                                   |
| $\text{Cs}_4\text{GeO}_4$ (pH 14)                                   | 36.7977 [5.342]                   |                                   |
| Cs-germanate (17 Cs: 1 Ge)                                          | 34.1403 [5.455]                   |                                   |
| $\text{Nb}_{16}\text{Si}_3\text{-CO}_3$ (0.1 M, 5°C)                | 21.6904 [55.723]                  | 50.9418 [423.392]                 |
| $\text{Nb}_{16}\text{Si}_3\text{-CO}_3$ (0.1 M, 10°C)               | 21.2728 [53.803]                  | 51.4257 [432.243]                 |
| $\text{Nb}_{16}\text{Si}_3\text{-CO}_3$ (0.1 M, 25°C)               | 20.4897 [57.354]                  | 51.20 [451.552]                   |
| $\text{Nb}_{16}\text{Si}_3\text{-CO}_3$ (0.1 M, 35°C)               | 19.3213 [59.213]                  |                                   |
| $\text{Nb}_{16}\text{Si}_3\text{-CO}_3$ (0.1 M, 45°C)               | 18.5772 [65.611]                  |                                   |
| $\text{Nb}_{16}\text{Si}_3\text{-CO}_3$ (0.1 M, 55°C)               | 17.9106 [73.511]                  |                                   |
| $\text{Nb}_{16}\text{Si}_3\text{-CO}_3$ (0.1 M, 25°C after heating) | 20.2433 [61.50]                   | 53 [644.430]                      |
| $\text{Nb}_{16}\text{Ge}_3\text{-CO}_3$ (0.05 M 5°C)                | 14.0525 [48.329]                  |                                   |
| $\text{Nb}_{16}\text{Ge}_3\text{-CO}_3$ (0.05 M 25°C)               | 12.0614 [42.211]                  |                                   |

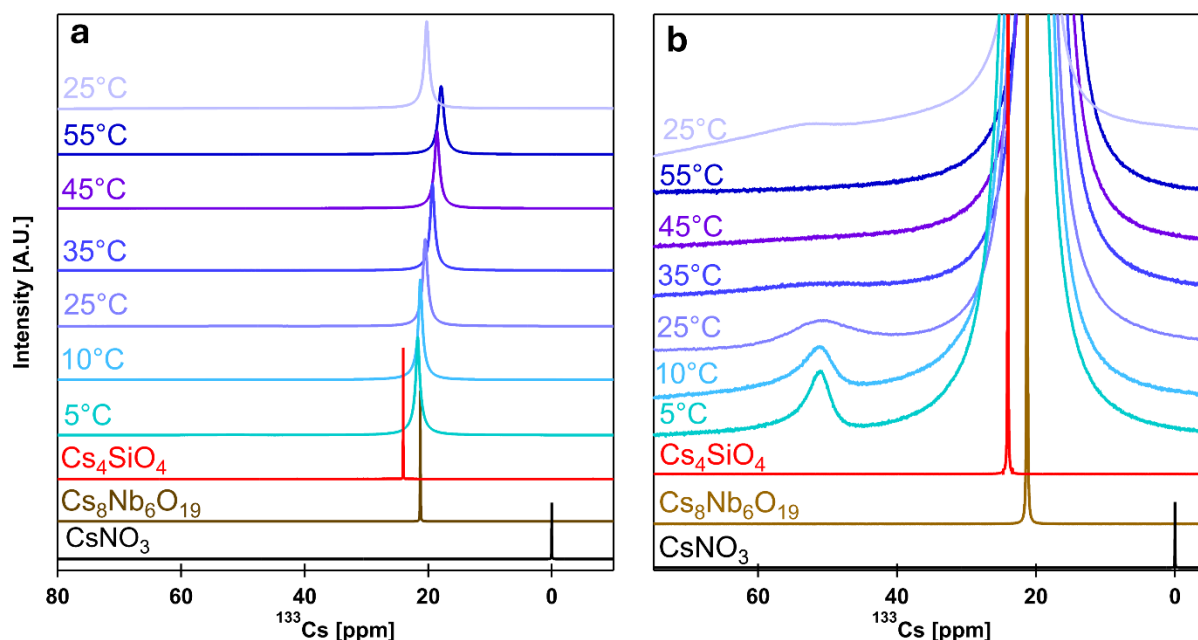

**Figure S6.** Variable temperature solution  $^{133}\text{Cs}$  NMR of  $\text{Nb}_{16}\text{Si}_3\text{-CO}_3$ ; (a) shows the full data collection window and (b) is an expanded view of the second peak, indicating bonding to the POM.  $\text{Cs}_4\text{SiO}_4$ ,  $\text{Cs}_8[\text{Nb}_6\text{O}_{19}]$ , and  $\text{CsNO}_3$  are shown for comparison.

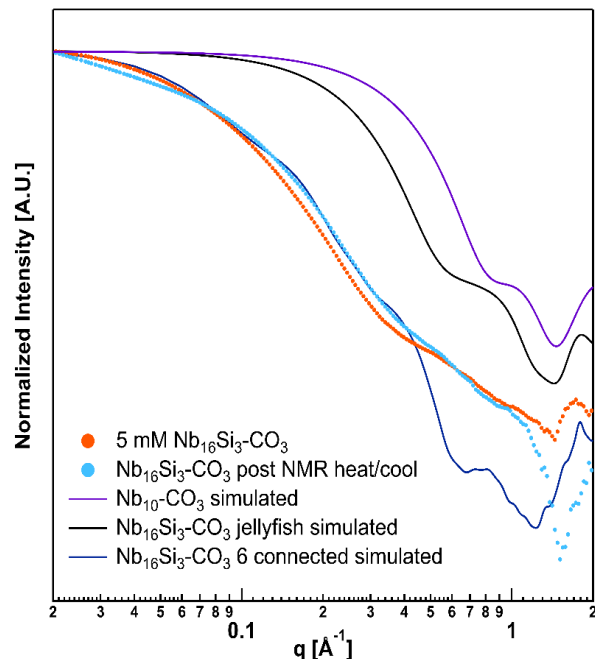

**Figure S7.** SAXS of freshly prepared  $\text{Nb}_{16}\text{Si}_3\text{-CO}_3$  (5 mM) compared to the sample after the  $^{133}\text{Cs}$  NMR heating/cooling cycle. Both scattering curves are similar, indicating the cluster is stable and intact after heating, and still matches a 6-connected cluster model.

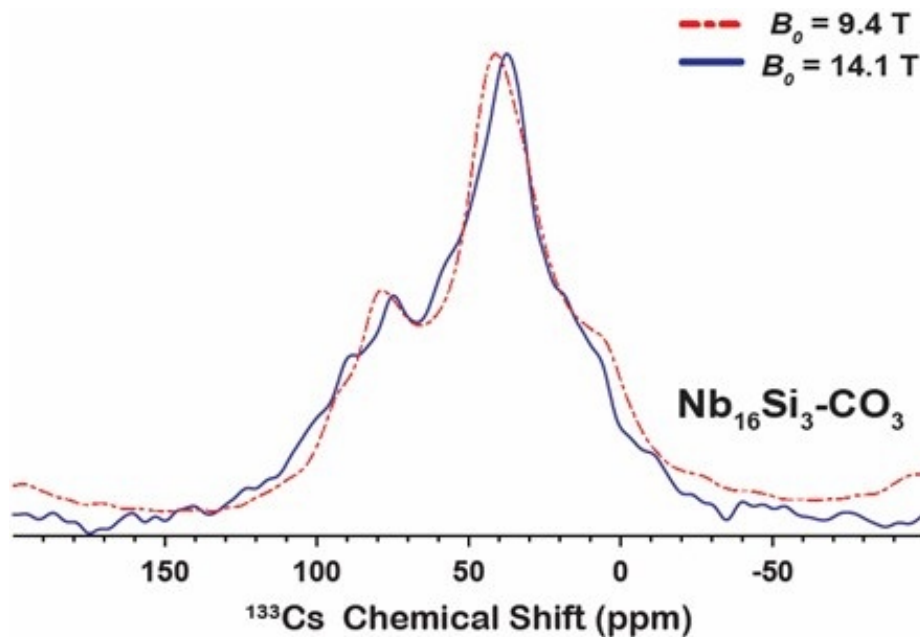

**Figure S8.**  $^{133}\text{Cs}$  ssNMR spectra of  $\text{Nb}_{16}\text{Si}_3\text{-CO}_3$  acquired at magnetic fields of 9.4 T and 14.1 T. The line shape at 9.4 T (red dashed line) matches the line shape of the 14.1 T NMR spectrum, suggesting that the quadrupolar broadening is negligible.

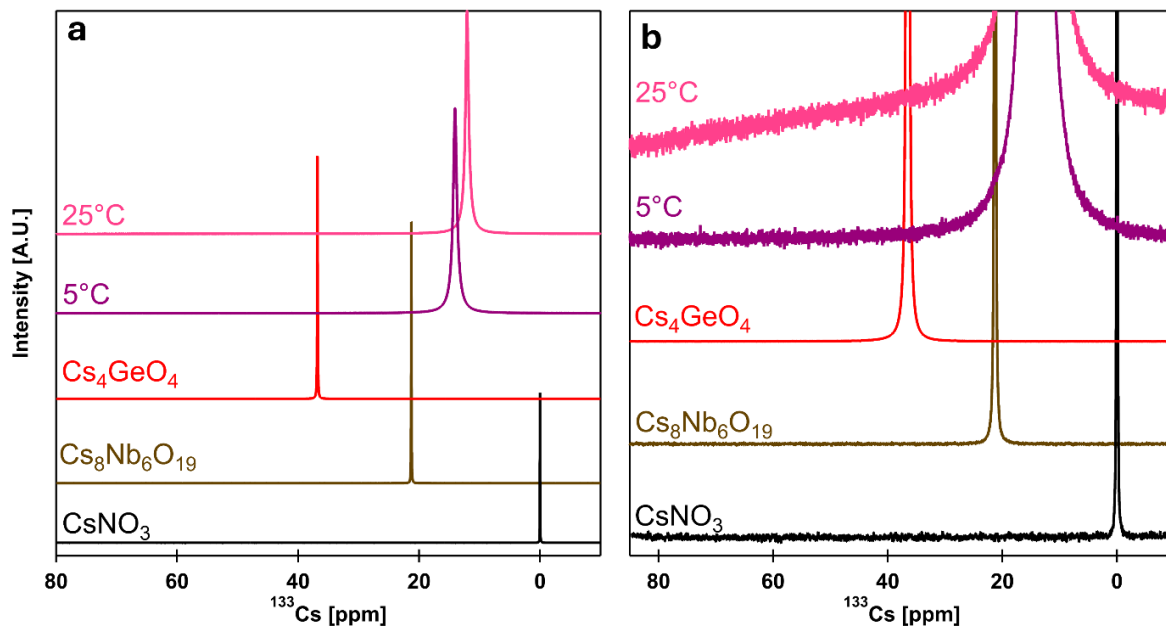

**Figure S9.**  $^{133}\text{Cs}$  NMR comparing the  $\text{Cs-Nb}_6$  and  $\text{Cs}_4\text{GeO}_4$  starting material to the crystallized  $\text{Nb}_{16}\text{Ge}_3\text{-CO}_3$  at 5 °C and 25 °C. (a) shows the full data collection range, and (b) shows the expanded region, indicating the POM-bound Cs is not present.

## 6. Small-angle X-ray Scattering of Redissolved Crystals.

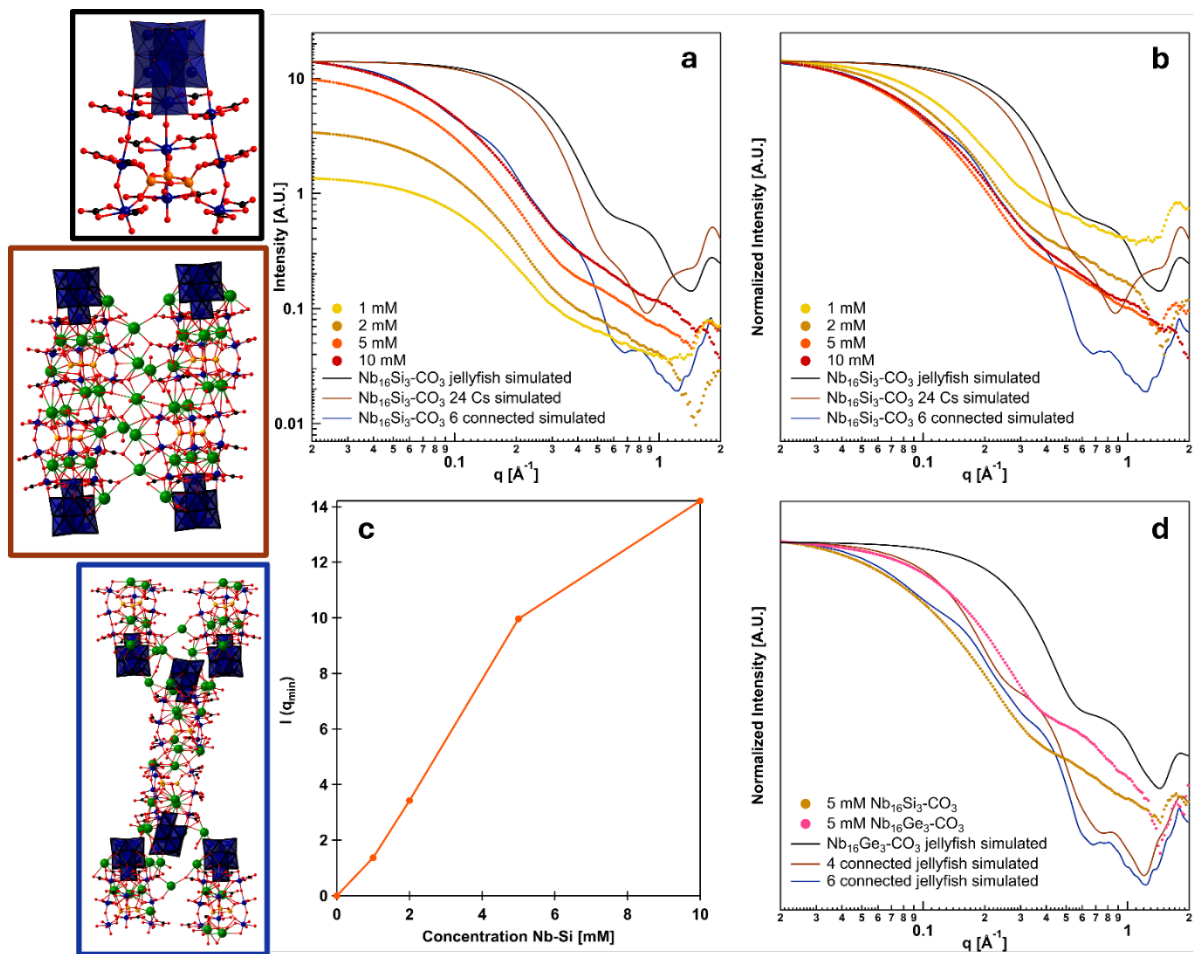

**Figure S10.** Experimental scattering curves of 1, 2, 5, and 10 mM  $\text{Nb}_{16}\text{Si}_3\text{-CO}_3$  (yellow, gold, orange, and red circles, respectively) compared to the simulated cluster scattering (solid lines), shown on the left with colors representing the simulated curves in the figure (i.e., single cluster (black), Cs-linked tetramer (brown), and Cs-linked hexamer (dark blue) shown at the original scattering intensity (a), and (b) normalized scattering intensity highlighting that no simulated scattering curve is a perfect match to the experimentally observed one. (c) Intensity ( $q_{min}$ ) as a function of concentration of  $\text{Nb}_{16}\text{Si}_3\text{-CO}_3$  to determine if association changes with increasing concentration. The scattering intensity increases linearly until 10 mM, suggesting similar connectivity between  $\text{Cs}^+$  and POMs. At 10 mmolar, the scattering intensity likely deviates from linearity due to X-ray attenuation from the Cs. Due to this, we used a maximum concentration of 5 mM for all other SAXS measurements of the clusters. (d) Experimental scattering of  $\text{Nb}_{16}\text{Si}_3\text{-CO}_3$  more closely matches the 6-connected hexamer (dark blue), whereas  $\text{Nb}_{16}\text{Ge}_3\text{-CO}_3$  is a better fit with a 4-connected tetramer (brown).

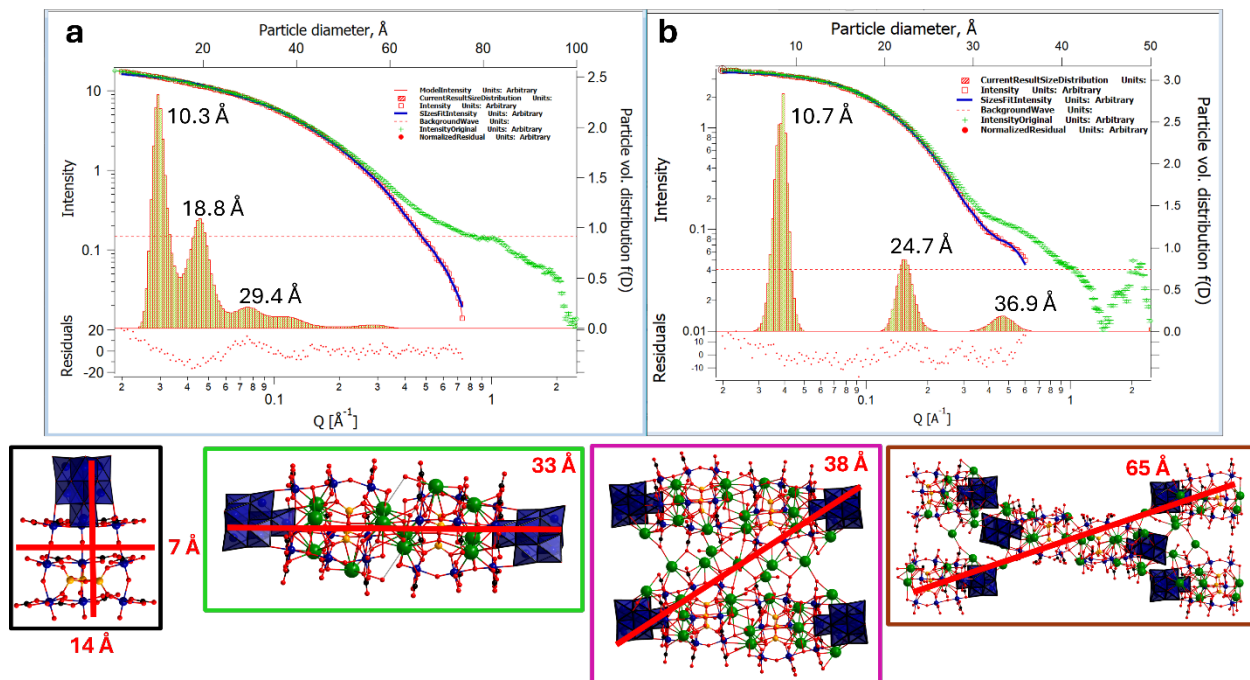

**Figure S11.** Size distribution analysis using the SAXS data of (a)  $\text{Nb}_{16}\text{Si}_3\text{-CO}_3$  and (b)  $\text{Nb}_{16}\text{Ge}_3\text{-CO}_3$ . Relevant cluster aggregate and sizes are represented below.

## 7. <sup>29</sup>Si NMR Spectroscopy.

**Table S10.** <sup>29</sup>Si NMR summary of pH, chemical shifts, and full width at half maximum for control experiments, crystal, and gel forming conditions.

| Sample                                                                               | pH   | chemical shift (ppm) [FWHM, Hz] |                      |                      |                     |                      |                     |                     |
|--------------------------------------------------------------------------------------|------|---------------------------------|----------------------|----------------------|---------------------|----------------------|---------------------|---------------------|
| Cs <sub>4</sub> SiO <sub>4</sub> (0.7 M Si)                                          | 14   | -71.9751<br>[10.71]             | -79.7632<br>[15.299] | -81.7109<br>[9.22]   | -81.9458<br>[8.36]  | -87.9128<br>[18.7]   | -88.9571<br>[13.68] | -89.4971<br>[10.20] |
| Na <sub>4</sub> SiO <sub>4</sub> (0.7 M Si)                                          | 14   | -71.5653<br>[13.218]            | -79.4981<br>[14.94]  | -81.5012<br>[12.153] | -87.8188<br>[16.96] | -89.4701<br>[11.87]  |                     |                     |
| Cs <sub>4</sub> SiO <sub>4</sub> (0.7 M Si)                                          | 12   | -72.0626<br>[9.13]              | -80.4631<br>[10.29]  |                      |                     |                      |                     |                     |
| CsNb <sub>6</sub> +<br>Cs <sub>4</sub> SiO <sub>4</sub> , 0 hrs<br>CO <sub>2</sub>   | 14   | -71.1937<br>[19.421]            | -79.9847<br>[22.422] | -80.8598<br>[9.29]   | -82.1526<br>[17.41] | -82.3429<br>[6.09]   |                     |                     |
| CsNb <sub>6</sub> +<br>Cs <sub>4</sub> SiO <sub>4</sub> , 1 hrs<br>CO <sub>2</sub>   | 14   | -72.1032<br>[11.320]            | -77.3029<br>[17.778] | -79.7277<br>[16.403] | -80.3022<br>[14.42] | -82.4097<br>[19.785] | -82.6605<br>[26.99] | -86.4991<br>[9.68]  |
| CsNb <sub>6</sub> +<br>Cs <sub>4</sub> SiO <sub>4</sub> , 2 hrs<br>CO <sub>2</sub>   | 13   | -72.0030<br>[5.797]             | -80.5779<br>[5.093]  |                      |                     |                      |                     |                     |
| CsNb <sub>6</sub> +<br>Cs <sub>4</sub> SiO <sub>4</sub> , 3 hrs<br>CO <sub>2</sub>   | 12   | -80.6370<br>[4.34]              |                      |                      |                     |                      |                     |                     |
| CsNb <sub>6</sub> +<br>Cs <sub>4</sub> SiO <sub>4</sub> , 3.5<br>hrs CO <sub>2</sub> | 12   | -80.6351<br>[4.49]              |                      |                      |                     |                      |                     |                     |
| CsNb <sub>6</sub> +<br>Cs <sub>4</sub> SiO <sub>4</sub> , 4 hrs<br>CO <sub>2</sub>   | 11.5 | -80.6167<br>[4.54]              |                      |                      |                     |                      |                     |                     |
| CsNb <sub>6</sub> +<br>Cs <sub>4</sub> SiO <sub>4</sub> , 6 hrs<br>CO <sub>2</sub>   | 11.5 | -80.5841<br>[7.74]              |                      |                      |                     |                      |                     |                     |

|                                                                               |      |                     |                      |                      |                      |                      |                      |  |
|-------------------------------------------------------------------------------|------|---------------------|----------------------|----------------------|----------------------|----------------------|----------------------|--|
| CsNb <sub>6</sub> + Cs <sub>4</sub> SiO <sub>4</sub> , 8 hrs CO <sub>2</sub>  | 11   | no signal           |                      |                      |                      |                      |                      |  |
| CsNb <sub>6</sub> + Cs <sub>4</sub> SiO <sub>4</sub> , 18 hrs CO <sub>2</sub> | 10   | -88.7213<br>[8.85]  |                      |                      |                      |                      |                      |  |
| Nb <sub>16</sub> Si <sub>3</sub> -CO <sub>3</sub> rediss. (0.1 M)             | 10   | -88.6322<br>[9.345] |                      |                      |                      |                      |                      |  |
| CsNb <sub>6</sub> + SiO <sub>2</sub> (gel cond.), 0 hrs CO <sub>2</sub>       | 14   | -72.0853<br>[9.658] | -80.1362<br>[19.903] | -80.4469<br>[33.366] | -82.4928<br>[30.662] | -88.5105<br>[39.331] | -89.6940<br>[24.864] |  |
| CsNb <sub>6</sub> + SiO <sub>2</sub> (gel cond.), 2 hrs CO <sub>2</sub>       | 12   | -80.5433<br>[8.52]  |                      |                      |                      |                      |                      |  |
| CsNb <sub>6</sub> + SiO <sub>2</sub> (gel conds), 4 hrs CO <sub>2</sub>       | 11.5 | -80.5428<br>[9.15]  |                      |                      |                      |                      |                      |  |
| CsNb <sub>6</sub> + SiO <sub>2</sub> (gel cond), 8 hrs CO <sub>2</sub>        | 11   | -80.5236<br>[10.32] |                      |                      |                      |                      |                      |  |
| Cs <sub>4</sub> SiO <sub>4</sub> (0.7 M Si), 3 hrs CO <sub>2</sub>            | 11.5 | -72.1174<br>[1.672] | -80.7383<br>[3.13]   |                      |                      |                      |                      |  |
| Cs <sub>4</sub> SiO <sub>4</sub> (0.7 M Si), 4 hrs CO <sub>2</sub>            | 11   | -71.9229<br>[2.541] |                      |                      |                      |                      |                      |  |

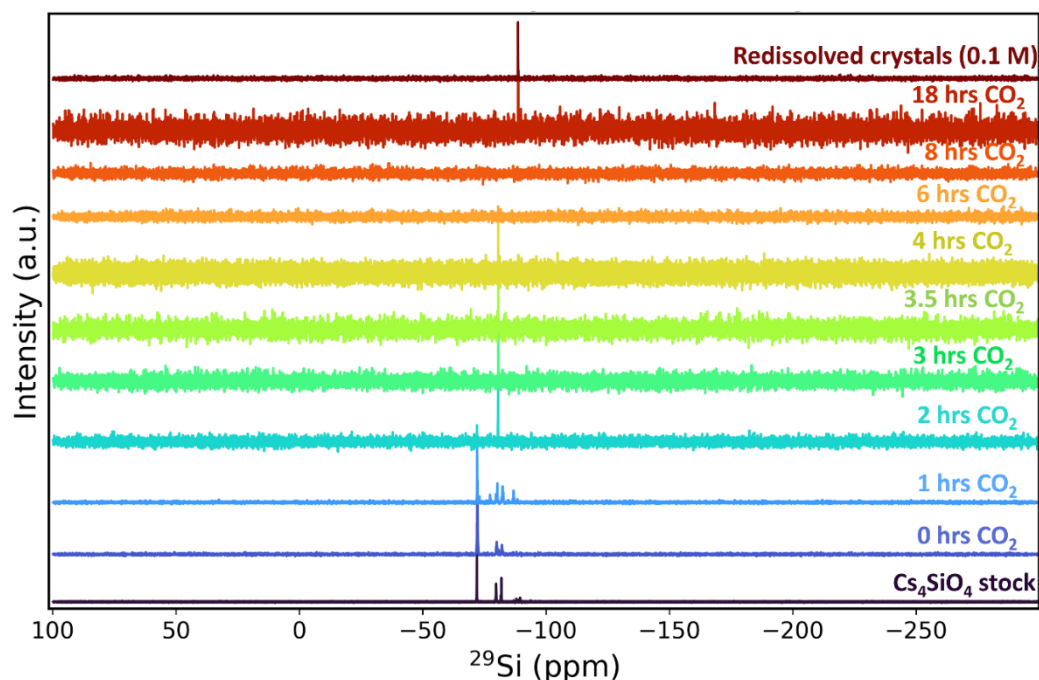

**Figure S12.** The full  $^{29}\text{Si}$  spectral window was used to collect data for studying the reaction mechanism of Cs-Nb<sub>6</sub> with Cs<sub>4</sub>SiO<sub>4</sub> and CO<sub>2</sub> infusion.

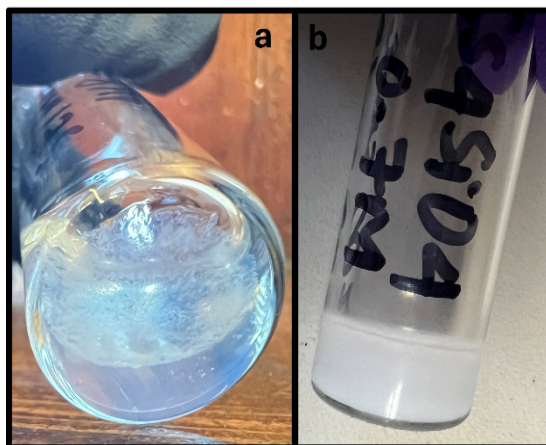

**Figure S13.** (a) Cs-Nb<sub>6</sub> and Cs<sub>4</sub>SiO<sub>4</sub> (0.7 M), after 8 hours of CO<sub>2</sub> exposure, have a gel-like precipitate, which is most apparent between 6-8 hours. The gel-like precipitate is mostly redissolved after 18-24 hours when crystal growth begins. (b) Cs<sub>4</sub>SiO<sub>4</sub> (0.7 M) without niobium present after 3 hours of CO<sub>2</sub> exposure. There is more precipitation compared to (a), and it does not redissolve or clear up over time (likely a mixture of SiO<sub>2</sub> and Cs<sub>2</sub>CO<sub>3</sub>).

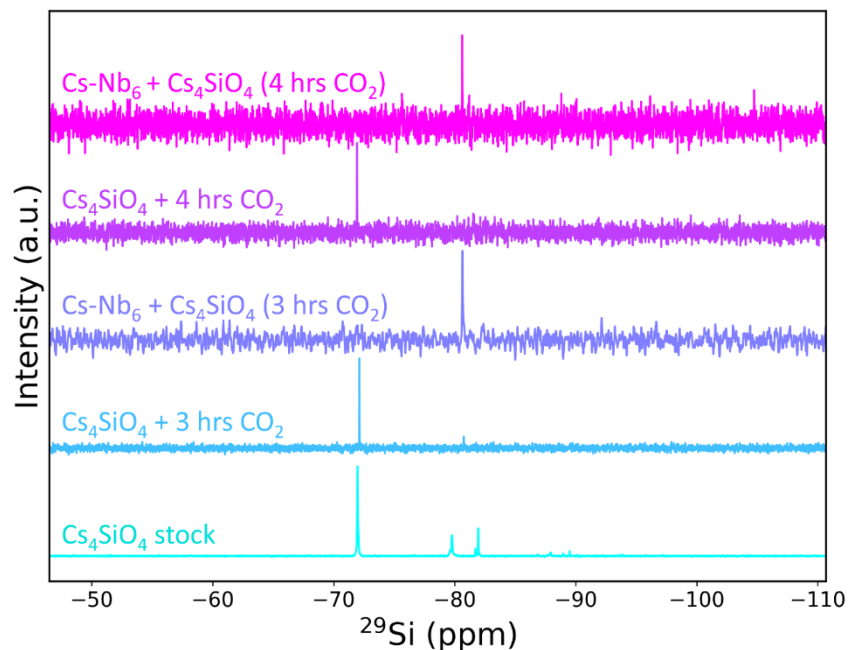

**Figure S14.** Solution  $^{29}\text{Si}$  NMR spectra of  $\text{Cs}_4\text{SiO}_4$  with and without  $\text{Cs-Nb}_6$  at 3- and 4-hours  $\text{CO}_2$  exposure. Without  $\text{Cs-Nb}_6$  (3 hrs), the  $\text{Cs}_4\text{SiO}_4$  spectrum has two peaks at -72.1 and -80.7 ppm, showing that both free and oligomeric silicate are present. This contrasts with the 3-hour  $\text{CO}_2$  spectrum with  $\text{Cs-Nb}_6$ , which only has one peak at -80.6 ppm, showing that the presence of niobium encourages oligomerization. Making the same comparison after 4 hours of  $\text{CO}_2$ , the oligomeric peak for  $\text{Cs}_4\text{SiO}_4$  alone is gone, and only the peak for free silicate remains, whereas with niobium, the oligomeric peak (trimer) is still present.

## 8. Characterization of precipitates, SEM/EDS

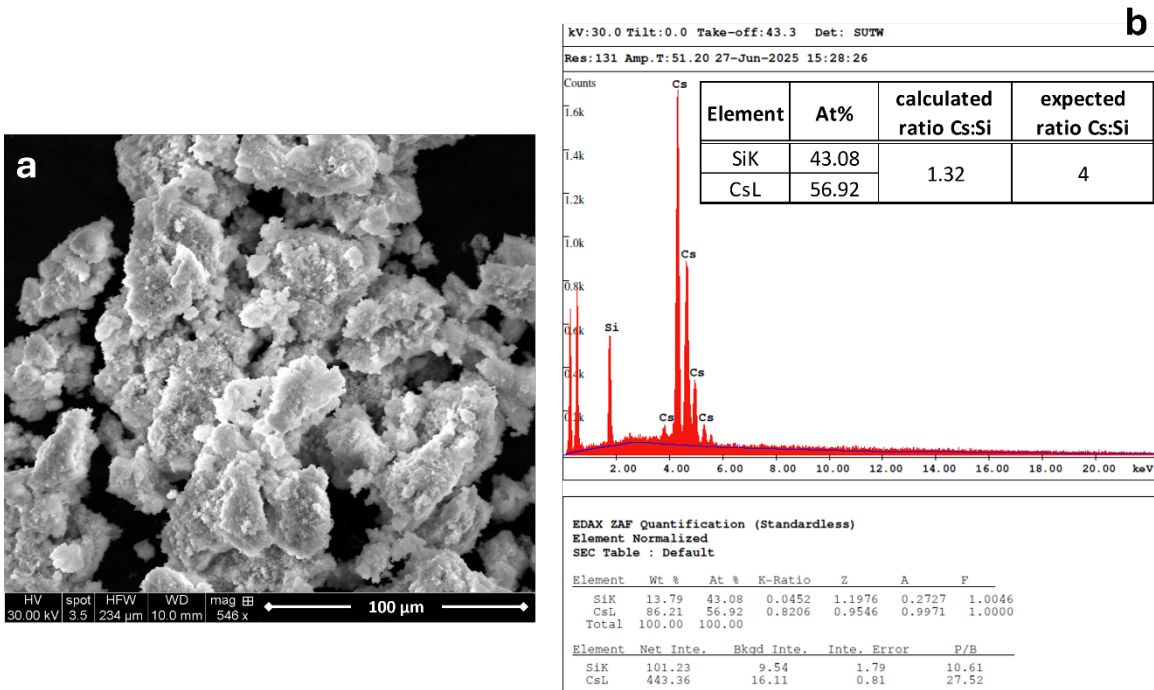

**Figure S15.** SEM (a) and (b) EDS of the cesium silicate precipitate after 4 hours of CO<sub>2</sub> exposure of the Cs<sub>4</sub>SiO<sub>4</sub> solution.

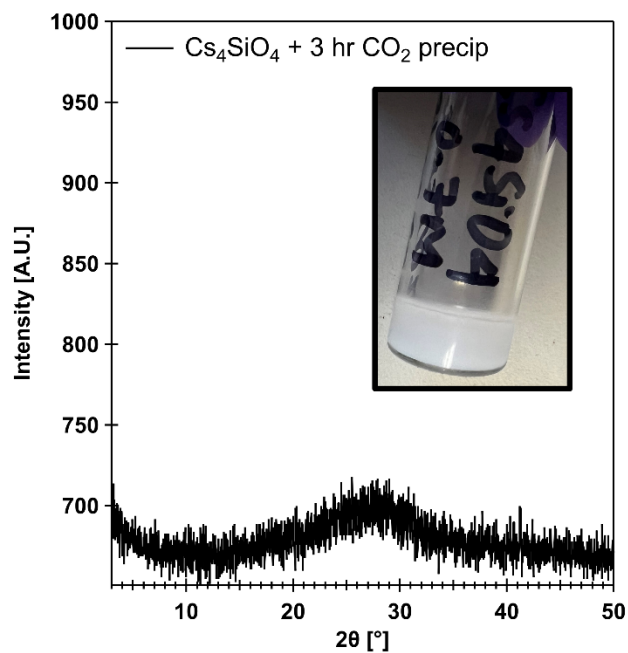

**Figure S16.** Powder X-ray diffraction of the precipitate obtained with Cs<sub>4</sub>SiO<sub>4</sub> after 3 hours of CO<sub>2</sub> (inset picture) indicates it is amorphous (no Bragg diffraction peaks).

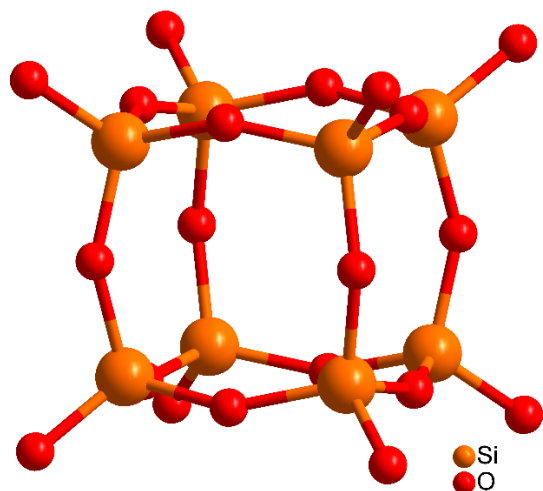

**Figure S17.** Structure of octasilicate,  $[\text{Si}_8\text{O}_{20}]^{8-}$ , previously reported by Smolin et al.,<sup>8</sup> and Wiebcke et al.,<sup>9</sup> and charge balanced by tetramethylammonium (TMA) counterions. Fully formulated as  $\text{TMA}_8[\text{Si}_8\text{O}_{20}] \cdot 65 \text{H}_2\text{O}$ .

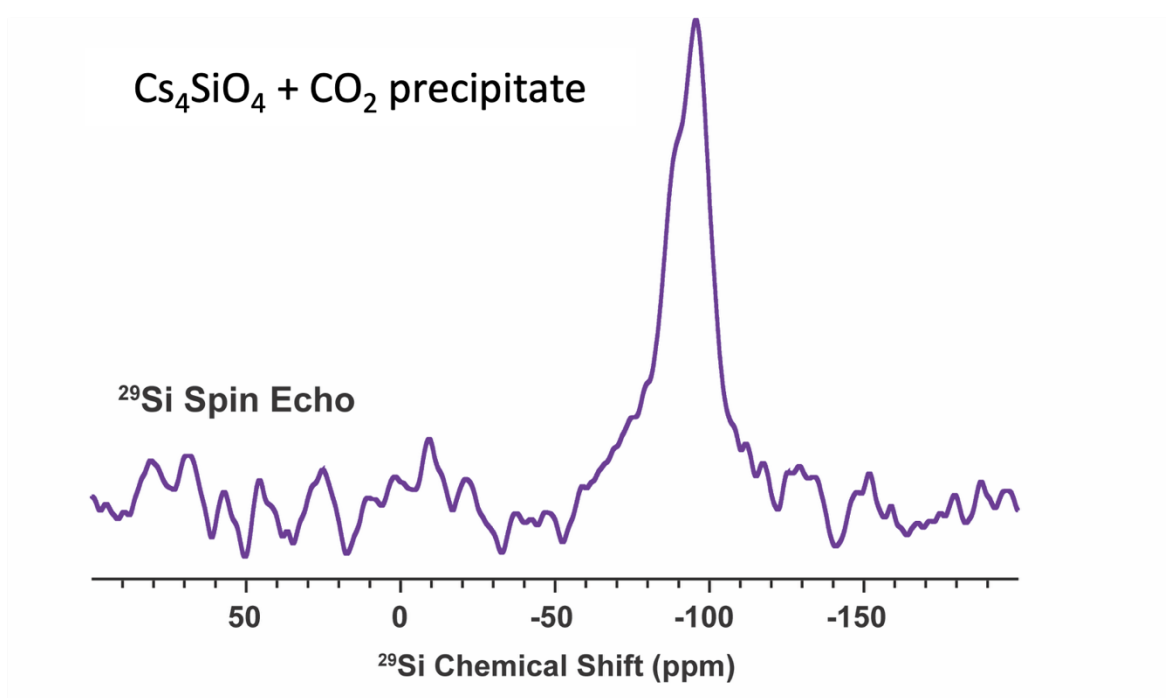

**Figure S18.** MAS  $^{29}\text{Si}$  ssNMR spectrum of the precipitate obtained after exposing  $\text{Cs}_4\text{SiO}_4$  to  $\text{CO}_2$ .

**Table S11.** Summary of  $^{29}\text{Si}$  ssNMR experimental parameters.

| Figure                | Compound                                | $B_0$ (T) | MAS (kHz) | Recycle Delay (s) | # of scans | Exp. Time (hr) |
|-----------------------|-----------------------------------------|-----------|-----------|-------------------|------------|----------------|
| Figure 5 <sup>a</sup> | $\text{Nb}_{16}\text{Si}_3\text{-CO}_3$ | 9.4       | 10        | 200               | 1024       | 56             |
| Figure 5 <sup>a</sup> | Nb-Si gel                               | 9.4       | 10        | 200               | 512        | 28             |
| Figure S18            | $\text{Cs}_4\text{SiO}_4 + \text{CO}_2$ | 9.4       | 10        | 250               | 352        | 24             |

<sup>a</sup>CPMG detection was used. Each CPMG echo was 4 rotor cycles in duration, with 80 spin echoes acquired.

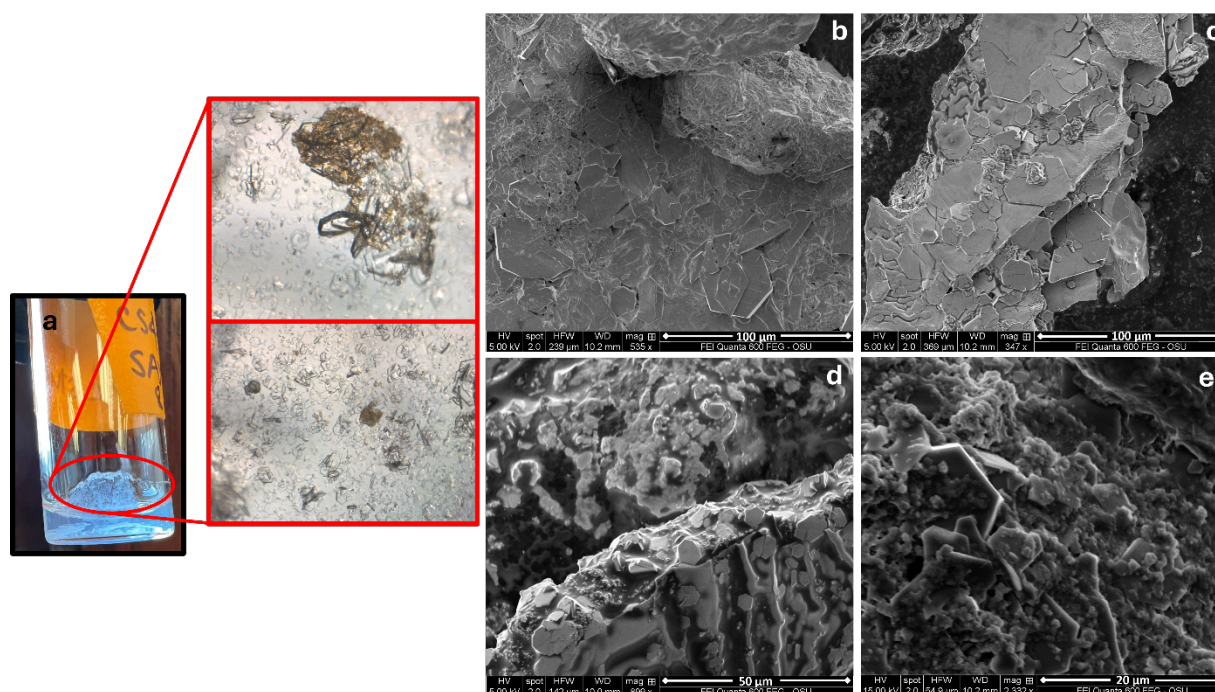

**Figure S19.** (a) macroscopic view of the gel-like precipitate in the  $\text{Nb}_{16}\text{Si}_3\text{-CO}_3$  reaction system after 8 hours of  $\text{CO}_2$ , with red boxes being the view under the microscope. (b) – (e) SEM images of the gel-like precipitate.  $\text{Nb}_{16}\text{Si}_3\text{-CO}_3$  crystals do appear to be growing out of the larger pieces of precipitate.

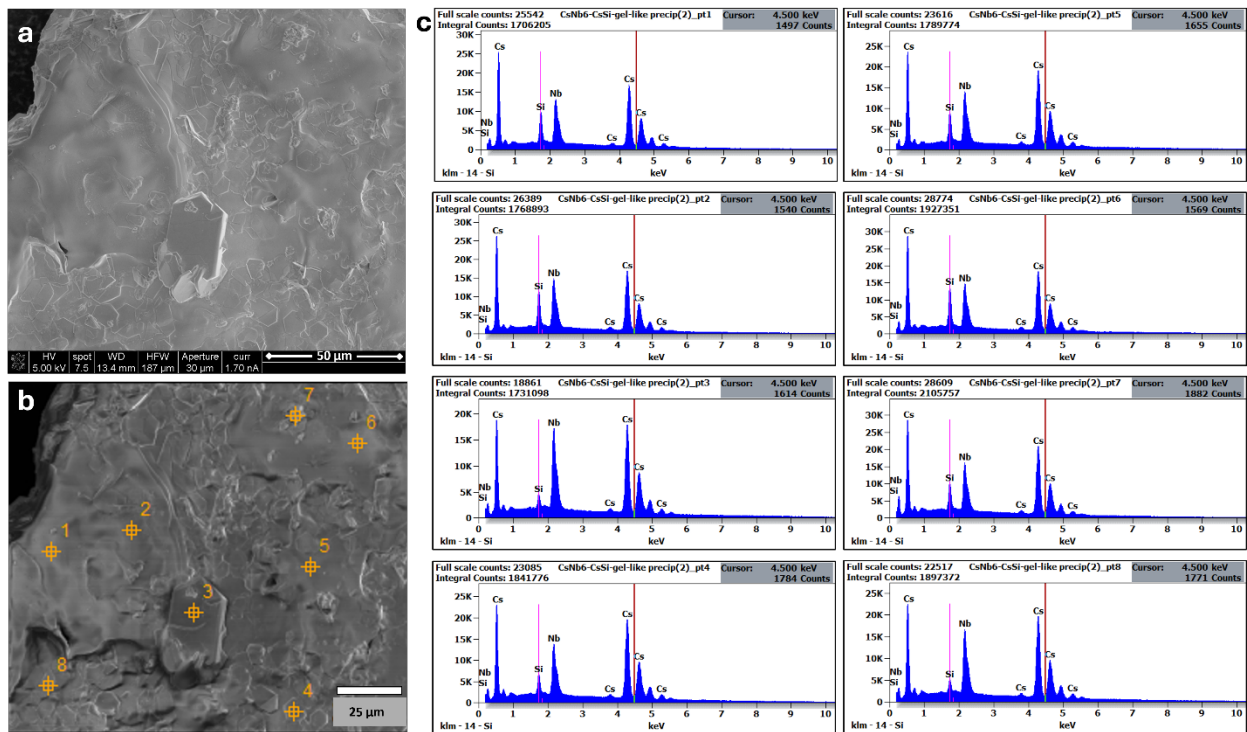

**Figure S20.** (a) and (b) SEM images corresponding to the point-by-point EDS analysis, with the spectra of each point shown in (c). We chose points that had the typical  $\text{Nb}_{16}\text{Si}_3\text{-CO}_3$  morphology (points 3, 4, and 8) and compared them to the larger piece (points 1, 2, 5, 6, and 7) they were ‘growing’ out of. Summarizing the EDS results in **Table S12**, we see that the points corresponding to the crystals have a lower Si content compared to the larger precipitate.

**Table S12.** Summary of the point-by-point EDS analysis of the gel-like precipitate of  $\text{Nb}_{16}\text{Si}_3\text{-CO}_3$ , showing that the Si content is lower for the points on crystals (points 3, 4, and 8, marked with ‘#’). Compared to the larger precipitate, their ratio of niobium to silicate is closer to what we expect from the crystal formula.

|       | At% Si | At% Nb | At% Cs | ratio Nb: Si | expected ratio Nb: Si |
|-------|--------|--------|--------|--------------|-----------------------|
| Pt 1  | 19.3   | 22.9   | 57.6   | 1.2          |                       |
| Pt 2  | 21.5   | 24.2   | 54.2   | 1.1          |                       |
| #Pt 3 | 6.52   | 30.7   | 62.6   | 4.7          |                       |
| #Pt 4 | 11.1   | 23     | 65.8   | 2.1          |                       |
| Pt 5  | 16.1   | 22.7   | 61.1   | 1.4          | 5.3                   |
| Pt 6  | 23.7   | 21.9   | 54.2   | 0.9          |                       |
| Pt 7  | 16.1   | 23.2   | 60.6   | 1.4          |                       |
| #Pt 8 | 6.87   | 27.9   | 65.1   | 4.1          |                       |

## 9. SAXS time-study

**Table S13.** Concentration of niobium, silicon, and cesium or sodium for relevant SAXS solutions, along with their scattering intensity at minimum  $q$  ( $\text{\AA}$ ).

| Sample                                                                                                     | Concentration (M) |      |          | $I_0$ ( $q_{\min}$ ) |
|------------------------------------------------------------------------------------------------------------|-------------------|------|----------|----------------------|
|                                                                                                            | Nb                | Si   | Cs or Na |                      |
| Nb <sub>16</sub> Si <sub>3</sub> -CO <sub>3</sub><br>(5 mM Nb <sub>16</sub> )                              | 0.08              | 0.02 | 0.12     | 9.78                 |
| Cs-Nb <sub>6</sub> + Cs <sub>4</sub> SiO <sub>4</sub> + 6 hrs CO <sub>2</sub><br>(10 mM Nb <sub>6</sub> )  | 0.06              | 0.01 | 0.10     | 3.65                 |
| Cs-Nb <sub>6</sub> + Cs <sub>4</sub> SiO <sub>4</sub> + 18 hrs CO <sub>2</sub><br>(10 mM Nb <sub>6</sub> ) | 0.06              | 0.01 | 0.10     | 3.34                 |
| Na <sub>4</sub> SiO <sub>4</sub> + 6 hrs CO <sub>2</sub><br>(1 M Si)                                       | 0                 | 1.0  | 4        | 3.65                 |

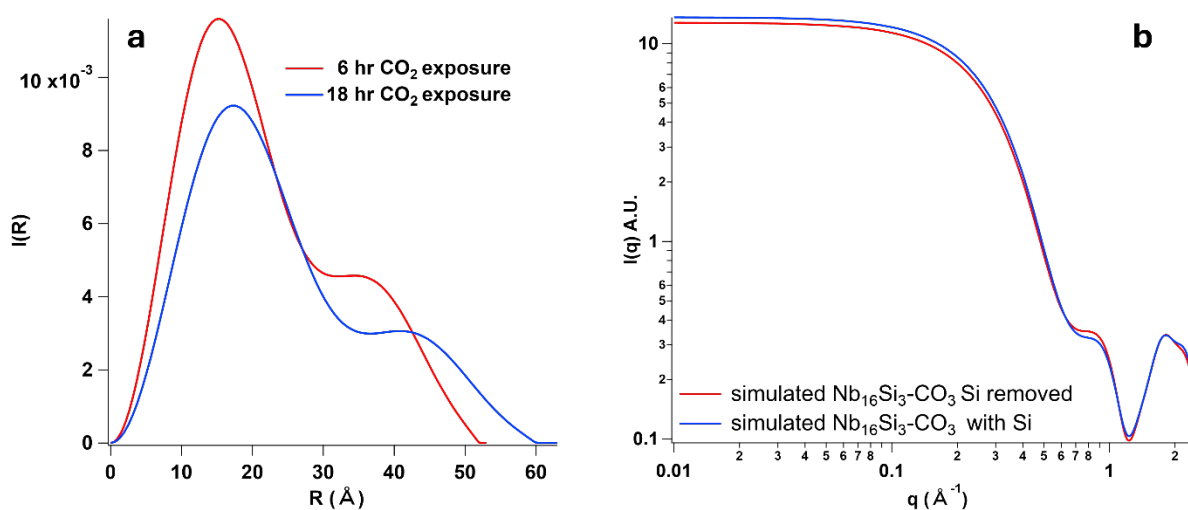

**Figure S21.** (a) SAXS analysis showing pair-distance distribution function (PDDF) of Cs-Nb<sub>6</sub> with Cs<sub>4</sub>SiO<sub>4</sub> after 6 and 18 hours of CO<sub>2</sub> exposure. The size of the cluster at 18 hours is slightly larger compared to that after 6 hours. (b) Simulations of Nb<sub>16</sub>Si<sub>3</sub>-CO<sub>3</sub> with and without the cyclic trimer. Little change in the scattering indicates that the Nb-POM contributes most to the overall intensity.

## 10. Raman and FTIR Spectroscopy; Gel characterization

**Table S14.** The percentage of each component present in the gel, as well as their normalized ratios.

| Sample                                            | % Alkali | % X (Si, Ge or PO <sub>4</sub> ) | % Nb | Ratio Alkali: X | Ratio X: Nb | Ratio Nb: Alkali |
|---------------------------------------------------|----------|----------------------------------|------|-----------------|-------------|------------------|
| Nb <sub>16</sub> Si <sub>3</sub> -CO <sub>3</sub> | 62       | 4.1                              | 34   | 0.63            | 0.35        | 0.02             |
| Nb <sub>16</sub> Ge <sub>3</sub> -CO <sub>3</sub> | 60       | 2.5                              | 37   | 0.51            | 0.38        | 0.11             |
| Nb-Si gel                                         | 49       | 14                               | 37   | 0.61            | 0.38        | 0.02             |
| Nb-Ge gel                                         | 55       | 3.2                              | 41   | 0.56            | 0.42        | 0.02             |
| Nb-PO <sub>4</sub> gel                            | 53       | 6.8                              | 40   | 0.54            | 0.41        | 0.05             |

**Table S15.** Raman frequencies (cm<sup>-1</sup>) of Nb<sub>16</sub>Si<sub>3</sub>-CO<sub>3</sub> and the Nb-Si gel, compared to literature values. Frequencies observed in both the crystalline and gel systems match literature values for the Si-O and Si-O oligomeric bonds, suggesting that the trimer is likely present in the Nb-Si gel.

| Nb <sub>16</sub> Si <sub>3</sub> -CO <sub>3</sub>    | average bond distance (Å) | Nb coord. number | *predicted Nb-O frequency of crystals (cm <sup>-1</sup> ) | frequency of Cs <sub>4</sub> SiO <sub>4</sub> (cm <sup>-1</sup> ) | frequency of crystals (cm <sup>-1</sup> ) | frequency of gel (cm <sup>-1</sup> ) | Literature frequency <sup>10-12</sup> (cm <sup>-1</sup> ) |
|------------------------------------------------------|---------------------------|------------------|-----------------------------------------------------------|-------------------------------------------------------------------|-------------------------------------------|--------------------------------------|-----------------------------------------------------------|
| μ <sub>6</sub> -O-Nb <sub>6</sub>                    | 2.37                      | 6                | 274.2                                                     |                                                                   | 315.4                                     | 314.4                                |                                                           |
| μ <sub>2</sub> -O-Nb (chains)                        | 2.26                      | 7                | 342.6                                                     |                                                                   | 383.3                                     | 390.6                                |                                                           |
| μ <sub>2</sub> -O-Nb (chains)                        | 2.18                      | 7                | 394.2                                                     | 446.0                                                             | 438.3                                     |                                      | 435.8 (Si-O-Si)                                           |
| μ <sub>2</sub> -O-Nb (chains)                        | 2.14                      | 7                | 425.3                                                     |                                                                   | 488.4                                     | 487.0                                |                                                           |
| Nb-O carbonate                                       | 2.12                      | 7                | 447.3                                                     |                                                                   | 534.7                                     | 543.4                                |                                                           |
| μ <sub>2</sub> -O-Nb (Nb <sub>7</sub> )              | 2.01                      | 6                | 548.5                                                     |                                                                   | 562.7                                     |                                      | 565.3 (Si-O-Si)                                           |
| Nb to μ <sub>2</sub> -O-Si                           | 1.98                      | 7                | 580.9                                                     | 603.0                                                             | 658.1                                     |                                      | 683.8 (Si-O-Si)                                           |
| μ <sub>2</sub> -O-Nb <sub>2</sub> (Nb <sub>6</sub> ) | 1.97                      | 6                | 594.3                                                     |                                                                   | 692.8                                     |                                      | 697.9; 708, 693 (ring mode)                               |
| Nb to μ <sub>2</sub> -O-Si                           | 1.96                      | 7                | 603.7                                                     |                                                                   | 729.0                                     | 714.5                                |                                                           |
| Nb-O (Nb <sub>7</sub> )                              | 1.88                      | 6                | 710.2                                                     | 772.0                                                             | 777.2                                     | 771.4 <sup>a</sup>                   | 788.4 (O-Si-O)                                            |
| Nb-O (chains)                                        | 1.81                      | 6                | 810.7                                                     |                                                                   | 822.1                                     | 821.1                                |                                                           |
| Nb-O (chains)                                        | 1.78                      | 7                | 855.6                                                     |                                                                   | 848.6                                     | 844.2                                | 857.2 (O-Si-O)                                            |
| Nb-O (chains)                                        | 1.78                      | 7                | 858.4                                                     |                                                                   | 858.7                                     |                                      | 858.1 (O-Si-O)                                            |
| Nb=Oyl (Nb <sub>6</sub> )                            | 1.77                      | 6                | 864.4                                                     |                                                                   | 890.5                                     | 889.6                                |                                                           |
| Nb=Oyl (chains)                                      | 1.72                      | 7                | 956.2                                                     | 926                                                               | 955.6                                     |                                      | 947/935 (Si-O)                                            |
| CsHCO <sub>3</sub>                                   |                           |                  |                                                           |                                                                   | 1012                                      |                                      | 1010/994 (Si-O)                                           |
| Cs <sub>2</sub> CO <sub>3</sub>                      |                           |                  |                                                           | 1060                                                              | 1054                                      | 1061                                 |                                                           |

\* Predicted frequencies were calculated using Hardcastle and Wachs' correlation<sup>13</sup> between frequency and Nb-O bond lengths ( $y = 25922 \exp(-1.9168x)$ , where  $x$  is the Nb-O bond length (Å)), combined with the bond distances in the Nb<sub>16</sub>Si<sub>3</sub>-CO<sub>3</sub> crystal structure. a - small shoulder

**Table S16.** Raman frequencies ( $\text{cm}^{-1}$ ) of  $\text{Nb}_{16}\text{Ge}_3\text{-CO}_3$  and the Nb-Ge gel, compared to literature values. Frequencies observed in both the crystalline and gel systems match literature values for the Ge-O and Ge-O oligomeric bonds, suggesting that the trimer is likely present in the Nb-Ge gel.

| $\text{Nb}_{16}\text{Ge}_3\text{-CO}_3$ | average bond distance (Å) | Nb coord. number | *predicted Nb-O frequency of crystals ( $\text{cm}^{-1}$ ) | frequency of $\text{Na}_4\text{GeO}_4$ ( $\text{cm}^{-1}$ ) | frequency of crystals ( $\text{cm}^{-1}$ ) | frequency of gel ( $\text{cm}^{-1}$ ) | Literature frequency <sup>14,15</sup> ( $\text{cm}^{-1}$ ) |
|-----------------------------------------|---------------------------|------------------|------------------------------------------------------------|-------------------------------------------------------------|--------------------------------------------|---------------------------------------|------------------------------------------------------------|
| $\mu_6\text{-O-Nb}_6$                   | 2.37                      | 6                | 273.7                                                      |                                                             |                                            |                                       |                                                            |
| $\mu_2\text{-O-Nb}$ (chains)            | 2.28                      | 7                | 330.6                                                      |                                                             | 313.42                                     | 312.45                                |                                                            |
| $\mu_2\text{-O-Nb}$ (chains)            | 2.20                      | 7                | 383.0                                                      |                                                             | 399.23                                     | 385.25                                |                                                            |
| $\mu_2\text{-O-Nb}$ (chains)            | 2.14                      | 7                | 429.6                                                      |                                                             | 442.62                                     |                                       | 439 (Ge-O)                                                 |
| Nb-O carbonate                          | 2.13                      | 7                | 440.3                                                      |                                                             | 483.12                                     | 482.16                                | 485 (Ge-O)                                                 |
| $\mu_2\text{-O-Nb}$ ( $\text{Nb}_7$ )   | 2.00                      | 6                | 556.8                                                      |                                                             | 537.6                                      | 543.39                                | 525; 527 (Ge-O-Ge)                                         |
| Nb to $\mu_2\text{-O-Ge}$               | 1.99                      | 6                | 568.7                                                      |                                                             | 561.71                                     | 561.22                                | 563 (Ge-O-Ge)                                              |
| $\mu_2\text{-O-Nb}_2$ ( $\text{Nb}_6$ ) | 1.98                      | 7                | 585.3                                                      |                                                             | 577.13 <sup>a</sup>                        |                                       | 500-570 (ring band)                                        |
| Nb to $\mu_2\text{-O-Ge}$               | 1.95                      | 7                | 620.1                                                      | 663.0                                                       | 658.13 <sup>a</sup>                        | 657.17 <sup>a</sup>                   | 620 (ring strain)                                          |
| Nb-O ( $\text{Nb}_7$ )                  | 1.88                      | 6                | 704.4                                                      |                                                             | 713.57                                     | 712.61                                |                                                            |
| Nb-O (chains)                           | 1.82                      | 6                | 784.3                                                      | 777.2                                                       | 771.91 <sup>a</sup>                        |                                       | 790 (Ge-O-Ge)                                              |
| Nb-O (chains)                           | 1.77                      | 6                | 877.6                                                      |                                                             | 803.25 <sup>a</sup>                        |                                       |                                                            |
| Nb-O (chains)                           | 1.76                      | 7                | 886.1                                                      |                                                             | 826.87                                     | 816.26                                |                                                            |
| Nb=Oyl ( $\text{Nb}_6$ )                | 1.75                      | 7                | 905.2                                                      |                                                             | 844.23                                     | 844.23                                |                                                            |
| Nb=Oyl (chains)                         | 1.72                      | 7                | 955.3                                                      |                                                             | 887.62                                     | 888.58                                |                                                            |
| $\text{CsHCO}_3$                        |                           |                  |                                                            |                                                             | 1014.4                                     | 1017.3                                |                                                            |
| $\text{Cs}_2\text{CO}_3$                |                           |                  |                                                            | 1068.4                                                      | 1057.3                                     | 1058.3                                |                                                            |

\* predicted frequencies were calculated using Hardcastle and Wachs' correlation<sup>13</sup> between frequency and Nb-O bond lengths ( $y = 25922 \exp(-1.9168x)$ , where  $x$  is the Nb-O bond length (Å)), combined with the bond distances in the  $\text{Nb}_{16}\text{Ge}_3\text{-CO}_3$  crystal structure.

a - small shoulder

**Table S17.** Raman frequencies ( $\text{cm}^{-1}$ ) of  $\text{Cs-Nb}_6$  and the  $\text{Nb-PO}_4$  gel, compared to literature values. Frequencies observed in the gel match literature values and correspond to both free phosphate and O-P-O bonding modes.

| $[\text{Nb}_6\text{O}_{19}]^{8-}$ | average bond distance ( $\text{\AA}$ ) | Nb coord. number | *predicted Nb-O frequency ( $\text{cm}^{-1}$ ) | frequency of $\text{Cs-Nb}_6$ ( $\text{cm}^{-1}$ ) | frequency of $\text{Cs}_3\text{PO}_4$ ( $\text{cm}^{-1}$ ) | frequency of $\text{Nb-PO}_4$ gel ( $\text{cm}^{-1}$ ) | Literature frequency <sup>16-19</sup> ( $\text{cm}^{-1}$ ) |                     |                                    |
|-----------------------------------|----------------------------------------|------------------|------------------------------------------------|----------------------------------------------------|------------------------------------------------------------|--------------------------------------------------------|------------------------------------------------------------|---------------------|------------------------------------|
| $\mu_6\text{-O-Nb}_6$             | 2.36                                   | 6                | 281.5                                          |                                                    |                                                            | 311.97                                                 | 420 (free $\text{PO}_4^{3-}$ )                             |                     |                                    |
|                                   |                                        |                  |                                                |                                                    |                                                            | 379.95                                                 |                                                            |                     |                                    |
|                                   |                                        |                  |                                                |                                                    |                                                            | 445.52                                                 |                                                            |                     |                                    |
|                                   |                                        |                  |                                                |                                                    |                                                            | 468.18                                                 |                                                            | 483.12              | 483 (internal $\text{PO}_4^{3-}$ ) |
|                                   |                                        |                  |                                                |                                                    |                                                            | 535.19                                                 |                                                            | 530.85 <sup>a</sup> | 566.53                             |
| $\mu_2\text{-O-Nb}_2$             | 1.95                                   | 6                | 612.3                                          |                                                    |                                                            | 631.61                                                 | 631 (internal $\text{PO}_4^{3-}$ )                         |                     |                                    |
|                                   |                                        |                  |                                                |                                                    |                                                            | 742.98                                                 | 716.47                                                     |                     |                                    |
|                                   |                                        |                  |                                                |                                                    |                                                            | 829.76                                                 | 814.34                                                     |                     |                                    |
|                                   |                                        |                  |                                                |                                                    |                                                            |                                                        | 844.23                                                     |                     |                                    |
| Nb=Oyl                            | 1.80                                   |                  | 816.0                                          | 880.39                                             | 989.83                                                     | 853.87                                                 | 886-1046 (P-O-P)                                           |                     |                                    |
|                                   |                                        |                  |                                                |                                                    |                                                            | 866.4                                                  |                                                            |                     |                                    |
| $\text{CsHCO}_3$                  |                                        |                  |                                                |                                                    |                                                            | 888.1                                                  |                                                            |                     |                                    |
| $\text{Cs}_2\text{CO}_3$          |                                        |                  |                                                | 1068.4                                             | 1067.9                                                     | 1016.8                                                 |                                                            |                     |                                    |
|                                   |                                        |                  |                                                |                                                    |                                                            | 1058.3                                                 |                                                            |                     |                                    |
|                                   |                                        |                  |                                                |                                                    |                                                            | 1124.8                                                 | 1118 (O-P-O)                                               |                     |                                    |

\* predicted frequencies were calculated using Hardcastle and Wachs' correlation<sup>13</sup> between frequency and Nb-O bond lengths ( $y = 25922 \exp(-1.9168x)$ , where  $x$  is the Nb-O bond length ( $\text{\AA}$ )), combined with the bond distances in the  $\text{Cs}_8\text{Nb}_6\text{O}_{19}$  crystal structure.

a – shoulder

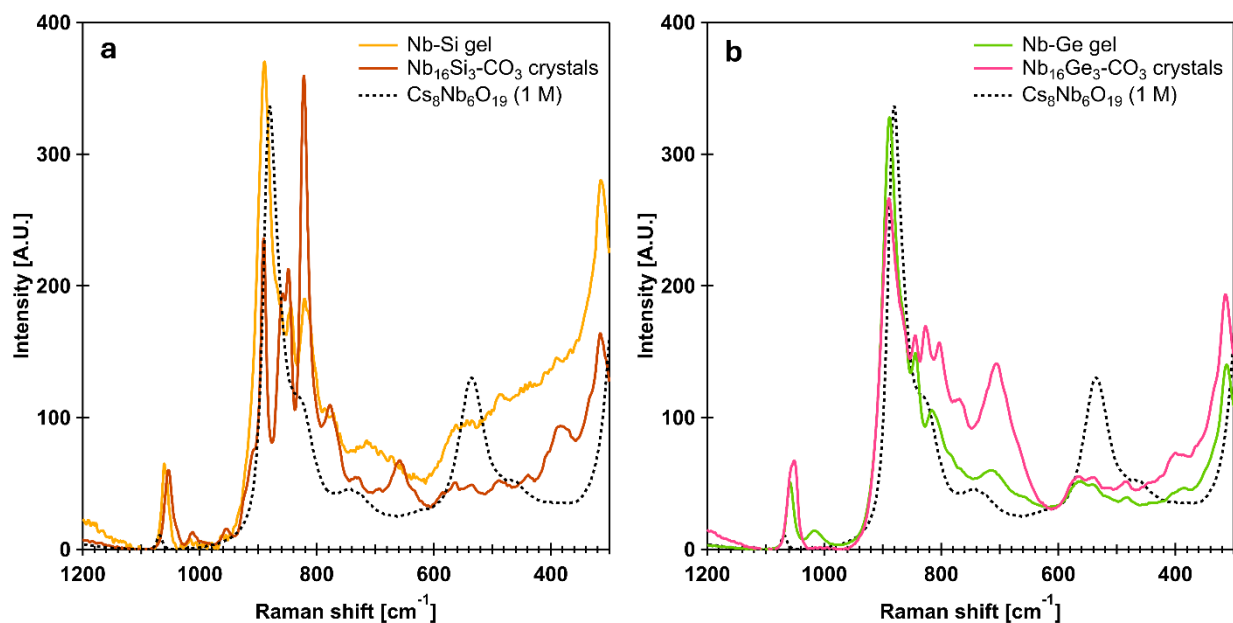

**Figure S22.** Raman comparison of the gel and crystal systems for (a)  $\text{Nb}_{16}\text{Si}_3\text{-CO}_3$  and Nb-Si gel, and (b)  $\text{Nb}_{16}\text{Ge}_3\text{-CO}_3$  and Nb-Ge gel. In both cases, the gels have many similar bonding frequencies, indicating that the gel system has an intact Nb-POM that is part of a larger gel network with Si or Ge oligomers.

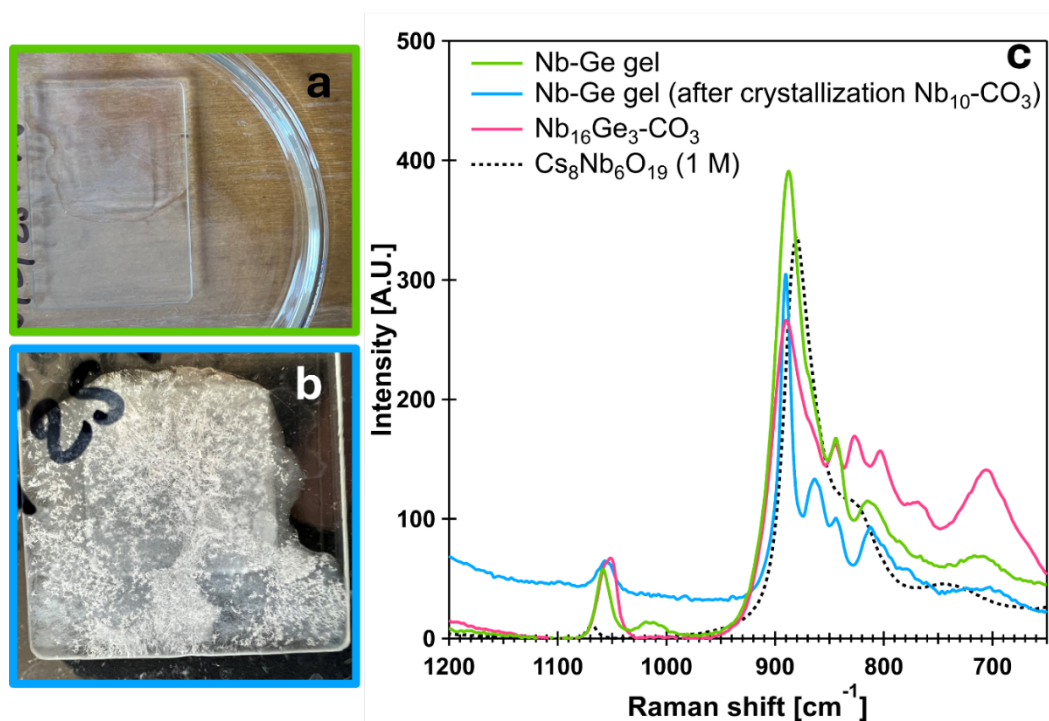

**Figure S23.** (a) The Nb-Ge gel was placed on a slide to dry and eventually ( $\sim 3$  weeks later) crystallized on the slide (b). X-ray crystallography confirmed that these crystals were  $\text{Nb}_{10}\text{-CO}_3$ . (c) Raman spectra of the recrystallized material compared to the fresh Nb-Ge gel have similar Nb-O features from  $\sim 900\text{-}800\text{ cm}^{-1}$ , proving that the gel contains an intact Nb-carbonate POM.

## 11. $^{31}\text{P}$ NMR Spectroscopy.

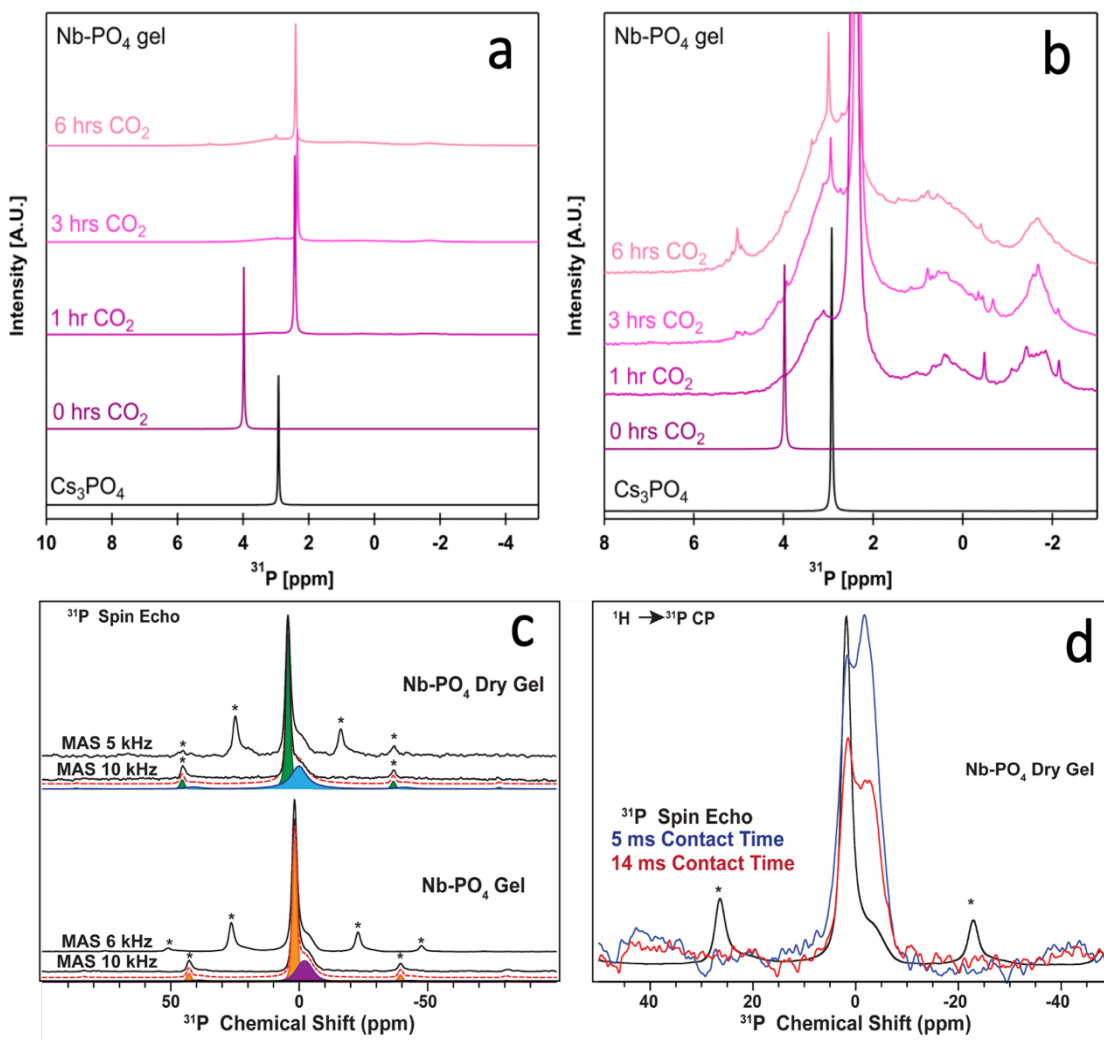

**Figure S24.** (a)  $^{31}\text{P}$  solution NMR spectra of  $\text{Cs-Nb}_6$  with  $\text{Cs}_3\text{PO}_4$  over time with continued  $\text{CO}_2$  exposure. Magnified regions are shown in (b). Significant changes to the spectrum occur after one hour of  $\text{CO}_2$ , with multiple new broad peaks appearing up and downfield from  $\text{Cs}_3\text{PO}_4$  or  $\text{Cs}_3\text{PO}_4$  with  $\text{Cs-Nb}_6$  (0 hours). A peak at  $\sim 5$  ppm grows in intensity over time and is similar to the previously reported chemical shifts of  $\text{PNb}_{12}$  and  $\text{PNb}_{14}$ .<sup>20</sup> (c) MAS  $^{31}\text{P}$  ssNMR spin echo spectra of the  $\text{Nb-PO}_4$  gel and  $\text{Nb-PO}_4$  dried gel obtained with a magnetic field of 14.1 T. (d)  $^1\text{H} \rightarrow ^{31}\text{P}$  CP of  $\text{Nb-PO}_4$  dried gel with various contact times. Asterisks (\*) indicate spinning sidebands.

**Table S18.** Summary of  $^{31}\text{P}$  ssNMR experimental parameters.

| Figure     | Compound                   | $B_0$ (T) | MAS (kHz) | Recycle Delay (s) | # of scans | Exp. Time (hr) |
|------------|----------------------------|-----------|-----------|-------------------|------------|----------------|
| Figure S25 | Nb-PO <sub>4</sub> gel     | 14.1      | 6         | 26                | 624        | 4.5            |
| Figure S25 | Nb-PO <sub>4</sub> gel     | 14.1      | 10        | 26                | 128        | 0.9            |
| Figure S25 | Nb-PO <sub>4</sub> dry gel | 14.1      | 5         | 26                | 16         | 0.1            |
| Figure S25 | Nb-PO <sub>4</sub> dry gel | 14.1      | 10        | 26                | 16         | 0.1            |
| Figure S25 | Nb-PO <sub>4</sub> dry gel | 14.1      | 10        | 0.3               | 8192       | 0.7            |
| Figure S25 | Nb-PO <sub>4</sub> dry gel | 14.1      | 10        | 0.3               | 8192       | 0.7            |

**Table S19.** Chemical shifts (ppm) and full width at half maximum for the  $^{31}\text{P}$  NMR spectra.

| Sample                                                                        | ppm     | FWHM (Hz)       |
|-------------------------------------------------------------------------------|---------|-----------------|
| 1 M Cs <sub>3</sub> PO <sub>4</sub>                                           | 2.9391  | 5.851           |
| Cs-Nb <sub>6</sub> -Cs <sub>3</sub> PO <sub>4</sub> t = 0 hrs CO <sub>2</sub> | 3.9821  | 6.841           |
| Cs-Nb <sub>6</sub> -Cs <sub>3</sub> PO <sub>4</sub> t = 1 hrs CO <sub>2</sub> | 3.1138  | 147.392         |
|                                                                               | 2.4311  | 9.291           |
|                                                                               | 0.4097  | broad multiplet |
|                                                                               | -0.475  | 14.174          |
|                                                                               | -1.4156 | 40.692          |
|                                                                               | -1.8407 | broad multiplet |
|                                                                               | -2.1409 | 22.279          |
|                                                                               | -6.6935 | 8.455           |
|                                                                               | -6.9593 | 6.852           |
| Cs-Nb <sub>6</sub> -Cs <sub>3</sub> PO <sub>4</sub> t = 3 hrs CO <sub>2</sub> | 5.0555  | 40.752          |
|                                                                               | 4.8696  | 23.928          |
|                                                                               | 3.9329  | shoulder        |
|                                                                               | 2.9533  | 17.403          |
|                                                                               | 2.3523  | 33.806          |
|                                                                               | 0.7909  | 35.401          |
|                                                                               | 0.6951  | broad multiplet |
|                                                                               | 0.5585  | broad multiplet |
|                                                                               | -0.3412 | 19.252          |
|                                                                               | -0.4378 | 10.413          |
|                                                                               | -0.667  | 34.664          |
|                                                                               | -1.6747 | 26.432          |
|                                                                               | -2.1245 | 23.998          |

|                                                                               |          |                 |
|-------------------------------------------------------------------------------|----------|-----------------|
|                                                                               | -8.7875  | 8.87            |
|                                                                               | 5.1537   | 12.043          |
|                                                                               | 5.0382   | 17.351          |
|                                                                               | 4.9445   | 9.386           |
|                                                                               | 3.3771   | shoulder        |
|                                                                               | 3.0026   | 22.544          |
|                                                                               | 2.4056   | 7.404           |
| Cs-Nb <sub>6</sub> -Cs <sub>3</sub> PO <sub>4</sub> t = 6 hrs CO <sub>2</sub> | 0.7815   | 35.475          |
|                                                                               | 0.5687   | 34.64           |
|                                                                               | -0.3982  | 28.469          |
|                                                                               | -1.6408  | broad multiplet |
|                                                                               | -8.8384  | 8.673           |
|                                                                               | -9.2833  | 13.769          |
|                                                                               | -10.7515 | 13.809          |

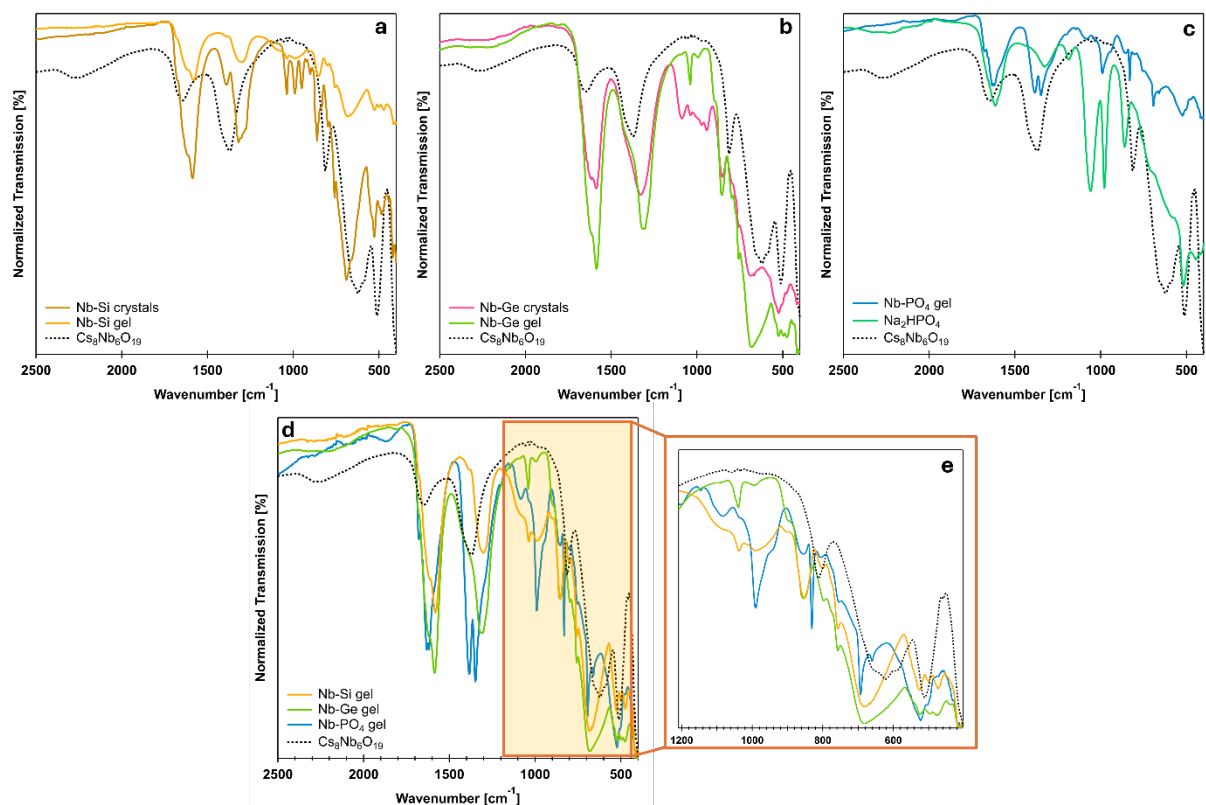

**Figure S25.** FTIR spectra of the crystalline and gel materials compared to the starting material, Cs-Nb<sub>6</sub>. (a) Nb<sub>16</sub>Si<sub>3</sub>-CO<sub>3</sub> and Nb-Si gel. (b) Nb<sub>16</sub>Ge<sub>3</sub>-CO<sub>3</sub> and Nb-Ge gel, (c) Nb-PO<sub>4</sub> and Na<sub>2</sub>HPO<sub>4</sub>, (d) comparing all three gels (Nb-Si, Nb-Ge, and Nb-PO<sub>4</sub>), with magnified spectra in (e) highlighting the new features observed in the gels. Peak assignments are summarized in **Tables S17-S19**.

**Table S20.** FTIR wavenumbers ( $\text{cm}^{-1}$ ) associated with  $\text{Cs-Nb}_6$ ,  $\text{Cs}_2\text{CO}_3$ , the  $\text{Nb}_{16}\text{Si}_3\text{-CO}_3$  crystals, Nb-Si gel, and reported Si-O literature values. Literature frequencies match those of the crystals and gels, demonstrating that the cyclic trimer is present in the gel material.

| $\text{Cs}_8\text{Nb}_6\text{O}_{19}$<br>frequency<br>( $\text{cm}^{-1}$ ) | $\text{Cs}_2\text{CO}_3$<br>frequency<br>( $\text{cm}^{-1}$ ) | Nb-Si crystals<br>frequency ( $\text{cm}^{-1}$ ) | Nb-Si gel<br>frequency ( $\text{cm}^{-1}$ ) | Literature<br>frequency <sup>10,12</sup><br>( $\text{cm}^{-1}$ ) | Motion                                                        |
|----------------------------------------------------------------------------|---------------------------------------------------------------|--------------------------------------------------|---------------------------------------------|------------------------------------------------------------------|---------------------------------------------------------------|
|                                                                            |                                                               | 484 <sup>t</sup>                                 | 474 <sup>s</sup>                            | 435.8                                                            | Si-O <sub>br</sub> , SiOSi, OSiO                              |
|                                                                            |                                                               |                                                  | 500 <sup>s</sup>                            |                                                                  |                                                               |
| 512 <sup>s</sup>                                                           |                                                               | 528 <sup>s</sup>                                 | 525 <sup>s</sup>                            | 546                                                              | SiOSi, OSiO, Nb-O                                             |
| 623 <sup>b</sup>                                                           |                                                               |                                                  |                                             |                                                                  | Nb-O                                                          |
|                                                                            |                                                               | 691 <sup>b</sup>                                 | 684 <sup>vb</sup>                           | 683.8                                                            | Si-O <sub>br</sub> , SiOSi, O <sub>br</sub> SiO <sub>br</sub> |
|                                                                            |                                                               |                                                  |                                             | 697.9                                                            | SiOSi, OSiO                                                   |
|                                                                            |                                                               | 759 <sup>a</sup>                                 | 757 <sup>a</sup>                            | 743.7                                                            | OSiO                                                          |
|                                                                            |                                                               | 797 <sup>a</sup>                                 | 801 <sup>t</sup>                            | 788.4                                                            | OSiO                                                          |
| 813 <sup>s</sup>                                                           |                                                               |                                                  |                                             |                                                                  | Nb-O                                                          |
|                                                                            | 878                                                           | 861 <sup>s</sup>                                 | 853 <sup>b</sup>                            | 858.1                                                            | Si-O, SiOSi, OSiO,<br>( $\text{CO}_3^{2-}$ ) <sup>21</sup>    |
|                                                                            |                                                               | 901 <sup>t</sup>                                 |                                             |                                                                  |                                                               |
|                                                                            |                                                               | 951 <sup>s</sup>                                 |                                             |                                                                  |                                                               |
|                                                                            |                                                               | 991 <sup>s</sup>                                 |                                             |                                                                  |                                                               |
| 1033 <sup>t</sup>                                                          | 1041                                                          | 1038 <sup>s</sup>                                | 1038 <sup>t</sup>                           | 1022.5                                                           | Si-O, SiOSi, OSiO,<br>( $\text{CO}_3^{2-}$ ) <sup>21</sup>    |
|                                                                            |                                                               | 1276 <sup>a</sup>                                |                                             |                                                                  |                                                               |
|                                                                            |                                                               | 1319 <sup>b</sup>                                | 1303 <sup>b</sup>                           |                                                                  |                                                               |
| 1371 <sup>b</sup>                                                          | 1380                                                          | 1391 <sup>a</sup>                                |                                             |                                                                  | ( $\text{CO}_3^{2-}$ ) <sup>21</sup>                          |
|                                                                            | 1450                                                          |                                                  |                                             |                                                                  | ( $\text{CO}_3^{2-}$ ) <sup>21</sup>                          |
| 1648 <sup>b</sup>                                                          |                                                               |                                                  | 1582 <sup>b</sup>                           |                                                                  | Si-O, SiOSi, Nb-O                                             |
| 2271 <sup>vb</sup>                                                         |                                                               | 2412 <sup>b</sup>                                |                                             |                                                                  | Nb-O                                                          |

*s* - sharp

*b* - broad

*vb* - very broad

*t* - small

*a* - shoulder

**Table S21.** FTIR wavenumbers ( $\text{cm}^{-1}$ ) associated with  $\text{Cs-Nb}_6$ ,  $\text{Cs}_2\text{CO}_3$ , the  $\text{Nb}_{16}\text{Ge}_3\text{-CO}_3$  crystals, Nb-Ge gel, and reported literature values of other germanate phases. Literature frequencies match those of the crystals and gels, demonstrating that the cyclic trimer is present in the gel material.

| $\text{Cs}_8\text{Nb}_6\text{O}_{19}$<br>frequency<br>( $\text{cm}^{-1}$ ) | $\text{Cs}_2\text{CO}_3$<br>frequency<br>( $\text{cm}^{-1}$ ) | Nb-Ge<br>crystals<br>frequency<br>( $\text{cm}^{-1}$ ) | Nb-Ge gel<br>frequency<br>( $\text{cm}^{-1}$ ) | Literature<br>frequency <sup>14,15</sup><br>( $\text{cm}^{-1}$ ) | Motion                                          |
|----------------------------------------------------------------------------|---------------------------------------------------------------|--------------------------------------------------------|------------------------------------------------|------------------------------------------------------------------|-------------------------------------------------|
| 512 <sup>s</sup>                                                           |                                                               | 478 <sup>a</sup>                                       | 475 <sup>t</sup>                               | 515                                                              | GeOGe (3-membered ring), Nb-O                   |
|                                                                            |                                                               | 524 <sup>b</sup>                                       | 524 <sup>t</sup>                               | 520                                                              | ring band (3-membered ring)                     |
| 623 <sup>b</sup>                                                           |                                                               | 683 <sup>vb</sup>                                      | 681 <sup>b</sup>                               | 500-600                                                          | GeOGe, Nb-O                                     |
|                                                                            |                                                               | 757 <sup>a</sup>                                       | 758 <sup>a</sup>                               |                                                                  |                                                 |
|                                                                            |                                                               |                                                        | 797 <sup>a</sup>                               | 798                                                              | Ge-O                                            |
| 813 <sup>s</sup>                                                           |                                                               |                                                        |                                                | 848                                                              | Ge-O intracycle, Nb-O                           |
|                                                                            | 878                                                           | 851 <sup>s</sup>                                       | 855 <sup>s</sup>                               | 800-850                                                          | Ge ions (4 or 6 coordinate), $\text{CO}_3^{2-}$ |
|                                                                            |                                                               | 943 <sup>t</sup>                                       |                                                | 937                                                              | Ge-O ring                                       |
|                                                                            |                                                               | 971 <sup>t</sup>                                       |                                                |                                                                  |                                                 |
| 1033 <sup>t</sup>                                                          | 1041                                                          | 1038 <sup>t</sup>                                      | 1039 <sup>s</sup>                              |                                                                  | $\text{CO}_3^{2-}$                              |
|                                                                            |                                                               | 1089 <sup>a, b</sup>                                   |                                                |                                                                  |                                                 |
| 1371 <sup>b</sup>                                                          | 1380                                                          | 1327 <sup>b</sup>                                      | 1305 <sup>b</sup>                              | 1377-1415                                                        | GeOGe, Nb-O                                     |
|                                                                            | 1450                                                          | 1587 <sup>b</sup>                                      | 1586 <sup>b</sup>                              |                                                                  | $\text{CO}_3^{2-}$                              |
| 1648 <sup>b</sup>                                                          |                                                               | 1621 <sup>a</sup>                                      | 1621 <sup>a</sup>                              |                                                                  | Nb-O                                            |
| 2271 <sup>vb</sup>                                                         |                                                               |                                                        |                                                |                                                                  | Nb-O                                            |

*s* - sharp

*b* - broad

*vb* - very broad

*t* - small

*a* - shoulder

**Table S22.** FTIR wavenumbers ( $\text{cm}^{-1}$ ) from  $\text{Cs-Nb}_6$ ,  $\text{Cs}_2\text{CO}_3$ ,  $\text{Na}_2\text{HPO}_4$ , and the  $\text{Nb-PO}_4$  gel, and reported literature values of other phosphate phases. Literature frequencies match those of the gels. In particular, the frequencies between  $\sim 980$  and  $1200 \text{ cm}^{-1}$  imply connectivity between the phosphate groups.

| $\text{Cs}_8\text{Nb}_6\text{O}_{19}$<br>frequency<br>( $\text{cm}^{-1}$ ) | $\text{Cs}_2\text{CO}_3$<br>frequency<br>( $\text{cm}^{-1}$ ) | $\text{Na}_2\text{HPO}_4$<br>frequency<br>( $\text{cm}^{-1}$ ) | $\text{Nb-PO}_4$ gel<br>frequency<br>( $\text{cm}^{-1}$ ) | Literature<br>frequency <sup>17,18,22</sup><br>( $\text{cm}^{-1}$ ) | Motion                                            |
|----------------------------------------------------------------------------|---------------------------------------------------------------|----------------------------------------------------------------|-----------------------------------------------------------|---------------------------------------------------------------------|---------------------------------------------------|
|                                                                            |                                                               | 444 <sup>t</sup>                                               |                                                           |                                                                     |                                                   |
| 512 <sup>s</sup>                                                           |                                                               | 517 <sup>s</sup>                                               | 523 <sup>b</sup>                                          | 500-564                                                             | isolated $\text{PO}_4^{3-}$ , Nb-O                |
|                                                                            |                                                               |                                                                | 661 <sup>a, t</sup>                                       |                                                                     |                                                   |
|                                                                            |                                                               | 583 <sup>a</sup>                                               |                                                           | 581; 500-564                                                        | POP; $\text{PO}_4^{3-}$                           |
| 623 <sup>b</sup>                                                           |                                                               |                                                                | 693 <sup>s</sup>                                          |                                                                     | Nb-O                                              |
|                                                                            |                                                               | 710 <sup>a</sup>                                               |                                                           | 710                                                                 | POP                                               |
|                                                                            |                                                               |                                                                | 755 <sup>a, t</sup>                                       |                                                                     |                                                   |
| 813 <sup>s</sup>                                                           | 878                                                           | 860 <sup>s</sup>                                               | 831 <sup>s</sup>                                          |                                                                     | Nb-O                                              |
|                                                                            |                                                               | 980 <sup>s</sup>                                               | 990 <sup>s</sup>                                          | 986; 997, 981-994                                                   | 2(PO), POP;<br>pyrophosphate,<br>tripolyphosphate |
| 1033 <sup>t</sup>                                                          | 1041                                                          | 1060 <sup>s</sup>                                              |                                                           | 1061, 1064                                                          | 2(PO), Nb-O                                       |
|                                                                            |                                                               |                                                                | 1084 <sup>b, t</sup>                                      | 1084                                                                | pyrophosphate                                     |
|                                                                            |                                                               |                                                                | 1146 <sup>t</sup>                                         | 1149; 1140 - 1144                                                   | 2(PO); pyrophosphate                              |
|                                                                            |                                                               | 1186 <sup>t</sup>                                              |                                                           | 1188; 1170-1197                                                     | 2(PO); pyrophosphate                              |
|                                                                            |                                                               | 1326 <sup>b</sup>                                              | 1348 <sup>b</sup>                                         | 1289                                                                | 2(PO)                                             |
| 1371 <sup>b</sup>                                                          | 1380                                                          |                                                                | 1384 <sup>b</sup>                                         |                                                                     | $(\text{CO}_3^{2-})^{21}$                         |
|                                                                            | 1450                                                          |                                                                |                                                           |                                                                     | $(\text{CO}_3^{2-})^{21}$                         |
| 1648 <sup>b</sup>                                                          |                                                               | 1614 <sup>b</sup>                                              | 1627 <sup>b</sup>                                         |                                                                     | Nb-O                                              |
|                                                                            |                                                               |                                                                | 1676 <sup>a</sup>                                         |                                                                     | Nb-O                                              |
| 2271 <sup>vb</sup>                                                         |                                                               |                                                                |                                                           |                                                                     | Nb-O                                              |

*s* - sharp

*b* - broad

*vb* - very broad

*t* - small

*a* - shoulder

## 12. Thermogravimetry-mass spectroscopy and CHN analysis.

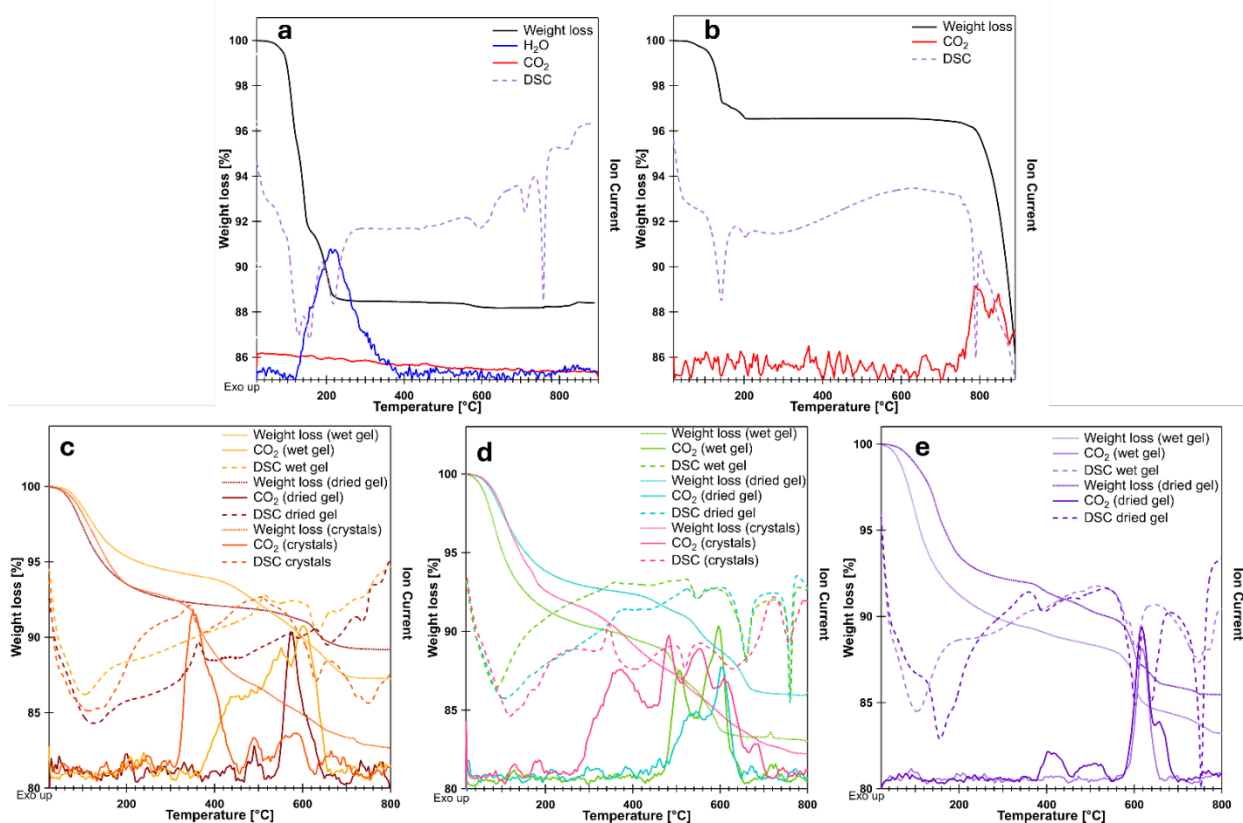

**Figure S26.** TGA-MS and DSC traces (exothermic is up) of (a) fresh  $\text{Cs}_8\text{Nb}_6\text{O}_{19}$ , (b)  $\text{Cs}_2\text{CO}_3$ , (c)  $\text{Nb}_{16}\text{Si}_3\text{-CO}_3$  crystals, and the Nb-Si gel (wet and dry), (d)  $\text{Nb}_{16}\text{Ge}_3\text{-CO}_3$  crystals and the Nb-Ge gel (wet and dry), and (e) Nb- $\text{PO}_4$  wet and dry gel. In (b) the  $\text{CO}_2$  signal is cut off at 800 °C due to our instrument capabilities, and the weight loss drops dramatically due to the volatilization of  $\text{Cs}_2\text{O}$  at high temperatures.<sup>23</sup>

**Table S23.** Summary of TGA-MS data showing the release temperatures of water and CO<sub>2</sub>, and the carbonate bonding environment (i.e., alkali or niobium-bound carbonate).

| Sample                                                                           | H <sub>2</sub> O release temperature (°C) | CO <sub>2</sub> release temperature (°C) | Assignment         |
|----------------------------------------------------------------------------------|-------------------------------------------|------------------------------------------|--------------------|
| Cs <sub>8</sub> Nb <sub>6</sub> O <sub>19</sub> . 13.86 H <sub>2</sub> O (fresh) | 113.4                                     |                                          | Lattice water      |
|                                                                                  | 142.0                                     |                                          | Lattice water      |
|                                                                                  | 204.9                                     |                                          | Lattice water      |
| Cs <sub>2</sub> CO <sub>3</sub>                                                  | 141.8                                     |                                          | Water              |
|                                                                                  |                                           | 738.4                                    | Alkali carbonate   |
| Nb <sub>16</sub> Si <sub>3</sub> -CO <sub>3</sub> crystals                       | 116.1                                     |                                          | Lattice water      |
|                                                                                  |                                           | 349.2                                    | Nb-bound carbonate |
|                                                                                  |                                           | 489.1                                    | Nb-bound carbonate |
|                                                                                  |                                           | 568.6                                    | Nb-bound carbonate |
|                                                                                  |                                           | 664.7                                    | Alkali-carbonate   |
| Nb <sub>16</sub> Ge <sub>3</sub> -CO <sub>3</sub> crystals                       | 120.7                                     |                                          | Lattice water      |
|                                                                                  |                                           | 370.9                                    | Nb-bound carbonate |
|                                                                                  |                                           | 481.5                                    | Nb-bound carbonate |
|                                                                                  |                                           | 553.9                                    | Nb-bound carbonate |
|                                                                                  |                                           | 608.9                                    | Alkali-carbonate   |
|                                                                                  |                                           | 682.9                                    | Alkali-carbonate   |
| Nb-Si wet gel                                                                    | 105.2                                     |                                          | Water              |
|                                                                                  |                                           | 465.9                                    | Nb-carbonate       |
|                                                                                  |                                           | 546.8                                    | Nb-carbonate       |
|                                                                                  |                                           | 599.0                                    | Alkali-carbonate   |
| Nb-Si dry gel                                                                    | 112.7                                     |                                          | Water              |
|                                                                                  |                                           | 489.0                                    | Nb-carbonate       |
|                                                                                  |                                           | 570.0                                    | Nb-carbonate       |
| Nb-Ge wet gel                                                                    | 92.81                                     |                                          | Water              |
|                                                                                  |                                           | 503.9                                    | Nb-carbonate       |
|                                                                                  |                                           | 600.7                                    | Alkali carbonate   |
| Nb-Ge dry gel                                                                    | 108.9                                     |                                          | Water              |
|                                                                                  |                                           | 534.2                                    | Nb-carbonate       |
|                                                                                  |                                           | 587.5                                    | Alkali carbonate   |
| Nb-PO <sub>4</sub> wet gel                                                       | 102.8                                     |                                          | Water              |
|                                                                                  |                                           | 619.2                                    | Alkali-carbonate   |
| Nb-PO <sub>4</sub> dry gel                                                       | 97.66                                     |                                          | Water              |
|                                                                                  |                                           | 398.8                                    | Nb-bound carbonate |
|                                                                                  |                                           | 499.0                                    | Nb-bound carbonate |
|                                                                                  |                                           | 599.4                                    | Alkali-carbonate   |
|                                                                                  |                                           | 634.68                                   | Alkali-carbonate   |
| Cs <sub>4</sub> SiO <sub>4</sub> 4 hr CO <sub>2</sub> precipitate                | 109.45                                    |                                          | Water              |
|                                                                                  |                                           | 213.4                                    | Bicarbonate        |
|                                                                                  |                                           | 259.87                                   | Bicarbonate        |
|                                                                                  |                                           | 402.94                                   | Si-bound carbonate |
|                                                                                  |                                           | 739.85                                   | Alkali-carbonate   |

**Table S24.** Summary of CHN results and TGA results comparing the weight percents and number of CO<sub>2</sub> per niobium (based on the crystal structure or the Cs-Nb<sub>6</sub> starting material for the gels). By combining this data, we estimate the ratios of each component present.

| Sample                                                      | % C (CHN) | Expected wt% C | wt% CO <sub>3</sub> (CHN) | wt% CO <sub>3</sub> (TGA) | CO <sub>3</sub> per Nb (CHN) | CO <sub>3</sub> per Nb (TGA) | wt % H <sub>2</sub> O (TGA) | H <sub>2</sub> O per Nb (TGA) | *X per Nb | formula ratios                                              |
|-------------------------------------------------------------|-----------|----------------|---------------------------|---------------------------|------------------------------|------------------------------|-----------------------------|-------------------------------|-----------|-------------------------------------------------------------|
| Nb <sub>16</sub> Si <sub>3</sub> -CO <sub>3</sub>           | 2.9       | 3.2            | 10.6                      | 11.0                      | 1.0                          | 1.1                          | 6.5                         | 1.6                           | 0.2       | 1 Nb : 1 CO <sub>3</sub><br>: 0.2 Si : 1.6 H <sub>2</sub> O |
| Nb <sub>16</sub> Ge <sub>3</sub> -CO <sub>3</sub>           | 2.8       | 3.1            | 10.1                      | 10.4                      | 0.99                         | 0.98                         | 7.5                         | 1.7                           | 0.2       | 1 Nb : 1 CO <sub>3</sub><br>: 0.2 Ge : 1.7 H <sub>2</sub> O |
| SiO <sub>2</sub> wet gel                                    | 0.6       |                | 2.3                       | 3.2                       | 0.28                         | 0.28                         | 6.8                         | 1.4                           | 0.2       | 1 Nb : 0.3 CO <sub>3</sub> : 0.2 Si : 1.4 H <sub>2</sub> O  |
| SiO <sub>2</sub> dried gel                                  | 1.9       |                | 6.9                       | 7.3                       | 0.66                         | 0.65                         | 5.2                         | 1.1                           | 0.2       | 1 Nb : 0.7 CO <sub>3</sub> : 0.2 Si : 1.1 H <sub>2</sub> O  |
| GeO <sub>2</sub> wet gel                                    | 1.6       |                | 5.9                       | 7.3                       | 0.72                         | 0.66                         | 9.0                         | 2.0                           | 0.1       | 1 Nb : 0.7 CO <sub>3</sub> : 0.1 Ge : 1.8 H <sub>2</sub> O  |
| GeO <sub>2</sub> dried gel                                  | 1.8       |                | 6.5                       | 7.0                       | 0.61                         | 0.61                         | 6.2                         | 1.3                           | 0.1       | 1 Nb : 0.6 CO <sub>3</sub> : 0.1 Ge : 1.2 H <sub>2</sub> O  |
| PO <sub>4</sub> wet gel                                     | 1.5       |                | 5.5                       | 6.6                       | 0.78                         | 0.60                         | 8.8                         | 2.0                           | 0.2       | 1 Nb : 0.8 CO <sub>3</sub> : 0.2 P : 2 H <sub>2</sub> O     |
| PO <sub>4</sub> dried gel                                   | 2.1       |                | 7.7                       | 8.1                       | 0.93                         | 0.71                         | 6.6                         | 1.4                           | 0.2       | 1 Nb : 0.9 CO <sub>3</sub> : 0.2 P : 1.5 H <sub>2</sub> O   |
| Cs <sub>4</sub> SiO <sub>4</sub> 3hr CO <sub>2</sub> precip | 1.5       |                | 5.5                       | 12.9                      |                              |                              | 20                          |                               |           |                                                             |

\* Where X = Si, Ge, or PO<sub>4</sub>, which were calculated by the moles used in the original synthesis.

### 13.Optical Spectroscopy

**Table S25.** Properties of the Nb-X thin-films as measured from spectroscopic ellipsometry and UV-vis spectroscopy.

| Sample             | Average roughness (nm) | Average thickness (nm) | Refractive index at 550 nm | *Average transmittance from 365 - 900 nm |
|--------------------|------------------------|------------------------|----------------------------|------------------------------------------|
| Nb-Si              | 9.5                    | 1497                   | 1.566                      | 89.0                                     |
| Nb-Ge              | 1.3                    | 805.8                  | 1.598                      | 90.4                                     |
| Nb-PO <sub>4</sub> | 5.6                    | 1084                   | 1.568                      | 90.1                                     |

\*An average was taken due to the oscillations seen in the spectra (typical of thin-film interferences).

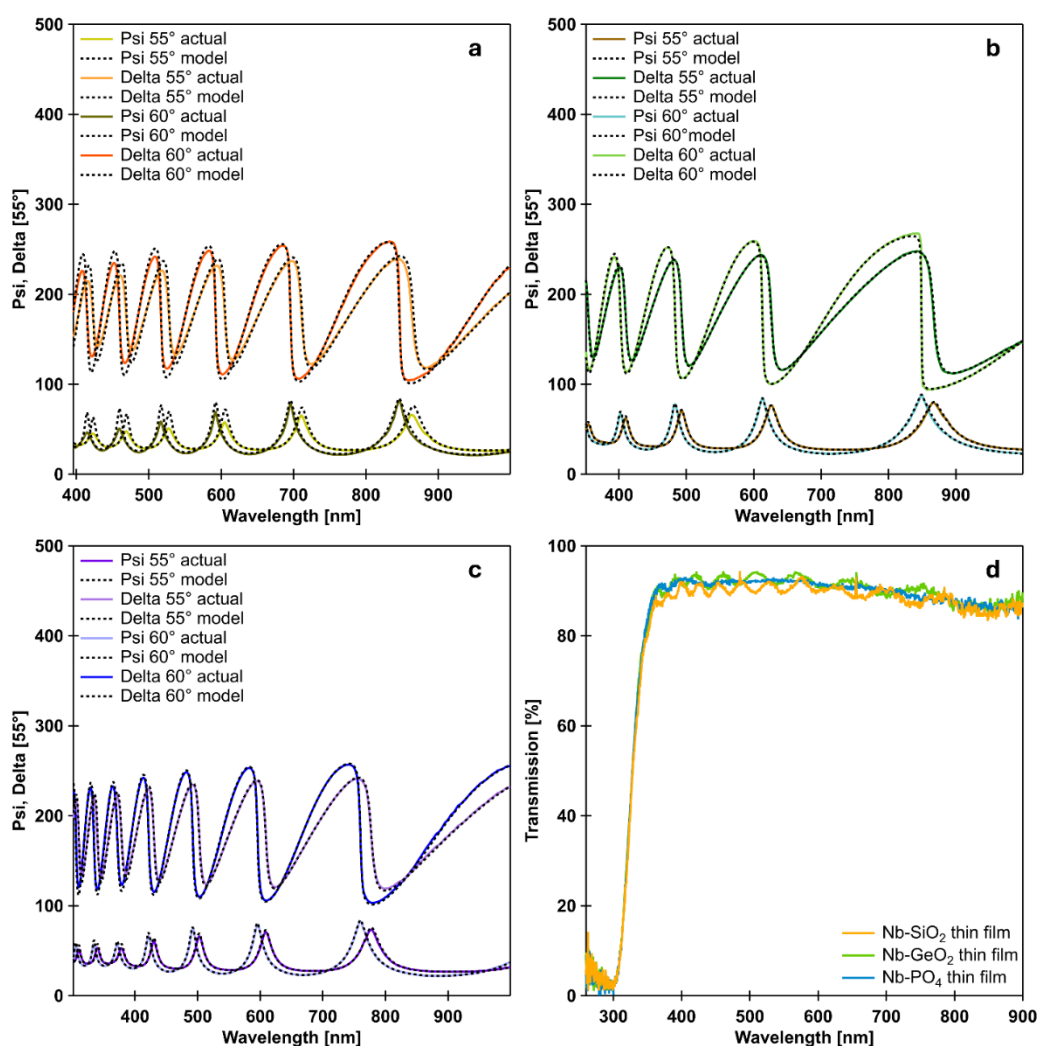

**Figure S27.** SE plots of (a) Nb-Si gel, (b) Nb-Ge gel, and (c) Nb-PO<sub>4</sub> gel, showing the fitting of psi and delta with the experimental data. (d) UV-vis spectra of the Nb-Si, Ge, and PO<sub>4</sub> gels as thin films on glass slides, highlighting their high optical transparency. Nb-Ge is the most transparent, followed by Nb-PO<sub>4</sub> and Nb-Si, which has the lowest transmittance.

## 14. Electronic Properties

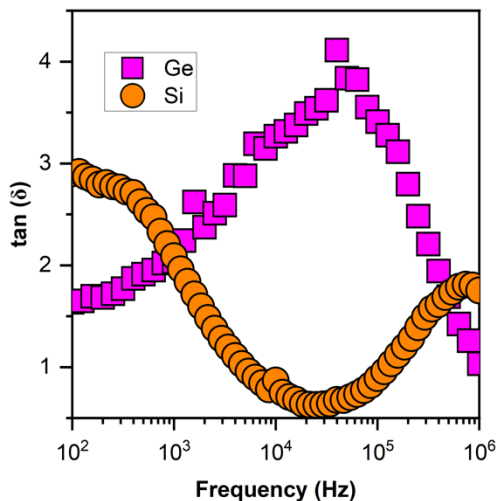

**Figure S28.** Dielectric loss tangent ( $\tan(\delta)$ ) data as a function of frequency from 100 Hz to 1 MHz. The Si gels are shown as orange circles, and the Ge gels are shown as magenta squares.

**Table S26.** Impedance spectroscopy data for the Nb-Si and Nb-Ge gels, with resistance (R), resistivity ( $\rho$ ), conductance and conductivity ( $\sigma$ ), and capacitance (C), for ionic (i-subscript) and electronic (e-subscript) mechanisms.

|                                           | Nb-Si gel | Nb-Ge gel |
|-------------------------------------------|-----------|-----------|
| $R_i$ (kW)                                | 180.4     | 117.3     |
| $r_i$ (W·cm)                              | 1.21E+06  | 2.58E+05  |
| $\sigma_i$ (S)                            | 5.50E-06  | 8.50E-06  |
| $s_i$ (conductivity, S·cm <sup>-1</sup> ) | 8.28E-07  | 3.88E-06  |
| $C_i$ (nF)                                | 1.101     | 0.695     |
| $R_e$ (kW)                                | 2.66E+16  | 2.27E+04  |
| $r_e$ (W·m)                               | 1.78E+20  | 4.99E+07  |
| $\sigma_e$ (S)                            | 3.8E-19   | 4.40E-08  |
| $s_e$ (conductivity, S·cm <sup>-1</sup> ) | 5.61E-21  | 2.01E-08  |
| $C_e$ (nF)                                | 184.4     | 11.7      |

## Supplementary Information References:

- 1 S. G. M, *SADABS*.
- 2 G. M. Sheldrick, *Acta Crystallogr. Sect. C Struct. Chem.*, 2015, **71**, 3–8.
- 3 J. Ilavsky and P. R. Jemian, *J. Appl. Crystallogr.*, 2009, **42**, 347–353.
- 4 R. K. Harris, E. D. Becker, S. M. Cabral De Menezes, R. Goodfellow and P. Granger, *Magn. Reson. Chem.*, 2002, **40**, 489–505.
- 5 M. Nyman, T. M. Alam, F. Bonhomme, M. A. Rodriguez, C. S. Frazer and M. E. Welk, *J. Clust. Sci.*, 2006, **17**, 197–219.
- 6 C. Hoch and C. Röhr, *Z. Für Naturforschung B*, 2001, **56**, 423–430.
- 7 C. Hoch and C. Röhr, *Z. Für Naturforschung B*, 2001, **56**, 1245–1256.
- 8 Y. Smolin I., Y. Shepelev F., R. Pomes, D. Hoebbel and W. Wieker, *Sov Phys Crystallogr Engl Transl.*, 1979, **24**, 19–23.
- 9 M. Wiebcke, M. Grube, H. Koller, G. Engelhardt and F. Jurgen, *Microporous Mater.*, 1993, **2**, 55–63.
- 10 J. D. Kubicki and D. Sykes, *Phys. Chem. Miner.*, 1993, **19**, 381–391.
- 11 S. Hoffmann and T. F. Fässler, *Inorg. Chem.*, 2006, **45**, 7968–7972.
- 12 J. Hanuza, M. Ptak, M. Mączka, K. Hermanowicz, J. Lorenc and A. A. Kaminskii, *J. Solid State Chem.*, 2012, **191**, 90–101.
- 13 F. D. Hardcastle and I. E. Wachs, *Solid State Ion.*, 1991, **45**, 201–213.
- 14 M. Tillard, P. Hermet, A. Haidoux, D. Granier and P. Armand, *J. Solid State Chem.*, 2021, **295**, 121925.
- 15 J. Alvarado-Rivera, D. A. Rodríguez-Carvajal, M. del C. Acosta-Enríquez, M. B. Manzanares-Martínez, E. Álvarez, R. Lozada-Morales, G. C. Díaz, A. de Leon and M. E. Zayas, *J. Am. Ceram. Soc.*, 2014, **97**, 3494–3500.
- 16 P. N. de Aza, C. Santos, A. Pazo, S. de Aza, R. Cuscó and L. Artús, *Chem. Mater.*, 1997, **9**, 912–915.
- 17 W. Jastrzębski, M. Sitarz, M. Rokita and K. Bułat, *Spectrochim. Acta. A. Mol. Biomol. Spectrosc.*, 2011, **79**, 722–727.
- 18 P. Goj, B. Handke and P. Stoch, *Sci. Rep.*, 2022, **12**, 17495.
- 19 A. Lanir and N. T. Yu, *J. Biol. Chem.*, 1979, **254**, 5882–5887.
- 20 J.-H. Son and W. H. Casey, *Chem. Commun.*, 2015, **51**, 1436–1438.
- 21 M. H. Brooker and J. Wang, *Spectrochim. Acta Part Mol. Spectrosc.*, 1992, **48**, 999–1008.
- 22 X.-H. Guan, Q. Liu, G.-H. Chen and C. Shang, *J. Colloid Interface Sci.*, 2005, **289**, 319–327.
- 23 T. R. Briere and A. H. Sommer, *J. Appl. Phys.*, 1977, **48**, 3547–3550.
